# Supplementary material for: Derivation of RCM-driven potential evapotranspiration for hydrological climate change impact analysis in Great Britain: a comparison of methods and associated uncertainty in future projections
Source: Copernicus journal article supplement (doi:10.5194/hess-17-1365-2013), 2013-04-10
Supplement: Supplementary file 1 [file hess-17-1365-2013-supplement.pdf]

1 **Derivation of RCM-driven potential evapotranspiration for**  
2 **hydrological climate change impact analysis in Great**  
3 **Britain: a comparison of methods and associated**  
4 **uncertainty in future projections**

5  
6 **C. Prudhomme<sup>1</sup> and J. Williamson<sup>1,\*</sup>**

7 **Supplementary material**

8  
9 **Sect. 1: PET methods and associated equations (for daily estimates)**

| PET method                                            | Equation                                                                                                                                                                                                                                                                                                                                                 |
|-------------------------------------------------------|----------------------------------------------------------------------------------------------------------------------------------------------------------------------------------------------------------------------------------------------------------------------------------------------------------------------------------------------------------|
| FAO56<br>(Allen et al., 1998)                         | $\text{PE}[\text{mm day}^{-1}] = \frac{\lambda^{-1}\Delta(\text{R}_n - \text{G}) + \gamma \frac{900}{\text{T} + 273} \text{U}_2(\text{e}_s - \text{e}_d)}{\Delta + \gamma(1 + 0.34\text{U}_2)}$                                                                                                                                                          |
| Penman-Monteith (modified) (Kay et al., 2003)         | $\text{PE}[\text{mm day}^{-1}] = \frac{1}{\lambda} \frac{\Delta(\text{R}_n - \text{G}) + \rho \text{C}_p(\text{e}_s - \text{e})/r_a}{\Delta + \gamma(1 + r_s/r_a)}$                                                                                                                                                                                      |
| Priestley-Taylor<br>(Priestley and Taylor, 1972)      | $\text{PE}[\text{mm day}^{-1}] = \alpha \frac{1}{\lambda} \frac{\Delta}{\Delta + \gamma} (\text{R}_n - \text{G})$                                                                                                                                                                                                                                        |
| Turc<br>(Turc, 1961)                                  | $\text{PE}[\text{mm day}^{-1}] = 0.31 \frac{\text{T}}{\text{T} + 15} (\text{R}_{\text{sn}} + 2.09) \left(1 + \frac{50 - \text{RH}}{70}\right)$ <p style="text-align: center;">for RH &lt; 50%</p> $\text{PE}[\text{mm day}^{-1}] = 0.31 \frac{\text{T}}{\text{T} + 15} (\text{R}_{\text{sn}} + 2.09)$ <p style="text-align: center;">for RH &gt; 50%</p> |
| Jensen-Haise<br>(Jensen et al., 1990)                 | $\text{PE}[\text{mm day}^{-1}] = \frac{1}{\lambda} 0.025(\text{T} + 3)\text{R}_s$                                                                                                                                                                                                                                                                        |
| Makkink<br>(Jacobs et al., 2009)                      | $\text{PE}[\text{mm day}^{-1}] = \frac{1}{\lambda} \frac{\text{R}_n}{\text{R}_s} \frac{\Delta}{\Delta + \gamma} \text{R}_s$                                                                                                                                                                                                                              |
| Priestley-Taylor Idso-Jackson<br>(Shuttleworth, 1993) | $\text{PE}[\text{mm day}^{-1}] = \alpha \frac{1}{\lambda} \frac{\Delta}{\Delta + \gamma} (1 - \alpha) \left(0.25 + 0.5 \frac{\text{n}}{\text{N}}\right) \text{S}_0$ $- \left(0.9 \frac{\text{n}}{\text{N}} + 0.1\right) \left(-0.02$ $+ 0.261 \exp(-7.7 \times 10^{-4} \text{T}^2)\right) \sigma \text{T}^4$                                             |

Hamon

(Oudin et al., 2005)

$$PE[\text{mm day}^{-1}] = \left(\frac{N}{12}\right)^2 \exp\left(\frac{T}{16}\right)$$

McGuinness-Bordne

(Oudin et al., 2005)

$$PE[\text{mm day}^{-1}] = \frac{1}{\lambda} S_0 \left(\frac{T+5}{68}\right)$$

Oudin

(Oudin et al., 2005)

$$\begin{cases} PE[\text{mm day}^{-1}] = \frac{1}{\lambda} S_0 \left(\frac{T+5}{100}\right) & \text{if } T > -5^\circ\text{C} \\ PE[\text{mm day}^{-1}] = 0 & \text{if } T \leq -5^\circ\text{C} \end{cases}$$

Blaney-Criddle

(Blaney and Criddle, 1950)

$$PE[\text{mm day}^{-1}] = kT p_d \text{ with } p_d = 100 \frac{N_d}{\sum_{i=1}^{365} N_i}$$

Thornthwaite

(Xu and Singh, 2001)

$$PE' = 16 \left(\frac{10T}{I}\right)^a$$

$$a = 0.49239 + 0.01792 I - 7.71 \cdot 10^{-5} I^2 + 6.75 \cdot 10^{-7} I^3$$

$$PE[\text{mm month}^{-1}] = PE' \frac{N_m D_m}{12 \cdot 30}$$

---

1

2

## 1 Sect. 2: Notations and used values of meteorological variables

- 2 Values used in the PET calculations calculated from meteorological inputs and the equations  
 3 used to calculate them

| Symbol     | Variable name                                  | Units                               | Description                                                                                                                                                                  | Formula                                                                                                                                                                                                                          |
|------------|------------------------------------------------|-------------------------------------|------------------------------------------------------------------------------------------------------------------------------------------------------------------------------|----------------------------------------------------------------------------------------------------------------------------------------------------------------------------------------------------------------------------------|
| $\delta$   | Solar declination                              | radians                             | Angle between rays of the sun and the plane of the earth's equator.                                                                                                          | $\delta = 0.4093 \sin\left(\frac{2\pi}{365}J - 1.405\right)$ <p>With <math>J</math> Julian day number</p> <p>Note that MORECS uses a different equation: <math>\delta = 0.41 \cos\left(\frac{2\pi(J-172)}{365}\right)</math></p> |
| $C_p$      | Specific heat at constant pressure (for water) | MJkg <sup>-1</sup> °C <sup>-1</sup> | Amount of heat required to change a unit mass of a substance by one degree in temperature<br><br>Note this is a re-arrangement of the equation of the Psychrometric constant | $C_p = \frac{\gamma \epsilon \lambda}{P}$ <p>With <math>\gamma</math> in KPaC<sup>-1</sup></p> <p><math>\lambda</math> in MJkg<sup>-1</sup></p> <p><math>P</math> in KPa</p>                                                     |
| $d_r$      | Relative earth-sun distance                    |                                     | Distance between earth and sun varies through the year due to the ellipse orbit of the earth around the sun.                                                                 | $d_r = 1 + 0.033 \cos\left(\frac{2\pi}{365}J\right)$                                                                                                                                                                             |
| $\omega_s$ | Sunset hour angle                              | radians                             | Angle by which the ray of the sun reaches the earth's surface.                                                                                                               | $\omega_s = \arccos(-\tan\Phi \tan\delta)$ <p>With <math>\Phi</math> latitude (+ is north, - is south)</p>                                                                                                                       |
| $N$        | Maximum possible daylight length               | hours                               | Length of the period when the rays of the sun reach the earth's surface.                                                                                                     | $N = \frac{24}{\pi} \omega_s$ <p>Note that MORECS uses a different equation:</p> $N = 24 - 2 \left( \frac{12}{\pi} \arccos(\tan\delta \tan\phi + 0.0145 \cos\delta \cos\phi) \right)$                                            |
| $e_s$      | Saturated water vapour pressure                | kPa                                 | Equilibrium of rates of vaporisation and condensation for a given temperature that occurs at particular vapour pressure, the saturated vapour pressure.                      | $e_s = 0.6108 e^{\left(\frac{17.27T}{237.3+T}\right)}$ <p>With <math>T</math> temperature in °C</p>                                                                                                                              |
| $e_a$      | Actual water vapour pressure                   | kPa                                 | Actual water vapour pressure at dew point.                                                                                                                                   | $e_a = 0.6108 e^{\left(\frac{17.27T_d}{237.3+T_d}\right)}$ <p>With <math>T_d</math> temperature at dew point, °C</p>                                                                                                             |
| $\Delta$   | Gradient of vapour pressure curve              | kPa°C <sup>-1</sup>                 | Gradient of vapour pressure curve is the slope of the non linear relationship between pressure and temperature.                                                              | $\Delta = \frac{4098 e_s}{(237.3 + T)^2}$                                                                                                                                                                                        |
| $\lambda$  | Latent heat of                                 | MJkg <sup>-1</sup>                  | Amount of energy needed for water to be                                                                                                                                      | $\lambda = 2.501 - 0.002361T$                                                                                                                                                                                                    |

| Symbol    | Variable name                 | Units                                 | Description                                                                                                                                                                                                                                                                                                                                                                                                                                                                             | Formula                                                                                                                                                                                                                                                                                                                                                                                                                                                                                                                                                                                                                                                                                                             |
|-----------|-------------------------------|---------------------------------------|-----------------------------------------------------------------------------------------------------------------------------------------------------------------------------------------------------------------------------------------------------------------------------------------------------------------------------------------------------------------------------------------------------------------------------------------------------------------------------------------|---------------------------------------------------------------------------------------------------------------------------------------------------------------------------------------------------------------------------------------------------------------------------------------------------------------------------------------------------------------------------------------------------------------------------------------------------------------------------------------------------------------------------------------------------------------------------------------------------------------------------------------------------------------------------------------------------------------------|
|           | vaporisation                  |                                       | transformed from a liquid to a gas, approximated as $\lambda=2.45 \text{ MJkg}^{-1}$ .                                                                                                                                                                                                                                                                                                                                                                                                  | <i>With T as 20°C</i>                                                                                                                                                                                                                                                                                                                                                                                                                                                                                                                                                                                                                                                                                               |
| <i>P</i>  | Atmospheric pressure          | kPa                                   | The change of pressure due to altitude                                                                                                                                                                                                                                                                                                                                                                                                                                                  | $P = 101.3 \left( \frac{293 - 0.0065z}{293} \right)^{5.26}$<br><i>With z elevation above sea level</i>                                                                                                                                                                                                                                                                                                                                                                                                                                                                                                                                                                                                              |
| $\rho_a$  | Mean air density              | Kgm <sup>-3</sup>                     | The mass of air per unit volume. It depends on the atmospheric pressure P and temperature T                                                                                                                                                                                                                                                                                                                                                                                             | $\rho_a = \frac{P}{T_{Kv}R}$<br><i>With TKv the virtual temperature:</i><br>$T_{Kv} = 1.01(T + 273) \text{ °K (T in °C)}$<br><i>and R specific gas constant for dry air (=0.287kJkg<sup>-1</sup>°K<sup>-1</sup>)</i>                                                                                                                                                                                                                                                                                                                                                                                                                                                                                                |
| <i>RH</i> | Relative humidity             | %                                     | Amount of water the air can hold at a certain temperature. In other words the percentage ratio of actual vapour pressure to saturated vapour pressure.                                                                                                                                                                                                                                                                                                                                  | $RH = 100 \frac{e_a}{e_s}$                                                                                                                                                                                                                                                                                                                                                                                                                                                                                                                                                                                                                                                                                          |
| <i>f</i>  | Cloudiness factor or fraction | [-]                                   | Amount of cloud cover in the atmosphere, related to number of bright sunshine hours in a day. Different coefficients can be used for humid and arid areas. Using the longwave coefficients for arid areas a simplified version of the formula can be derived.<br><br>A second expression is given by Jensen 1990. In this formula the cloudiness factor is expressed as the effect of clouds on short-wave global radiation<br><br>The simplified version is the one used in this paper | Shuttleworth, 1993<br>$f = \left( a_c \frac{b_s}{a_s + b_s} \right) \frac{n}{N} + (b_c + \frac{a_s}{a_s + b_s} a_s)$<br><i>With: n as bright sunshine hours (h),</i><br><i>a<sub>s</sub> is fraction of extraterrestrial radiation (S<sub>0</sub>) for n=0,</i><br><i>a<sub>s</sub>+ b<sub>s</sub> is fraction of extraterrestrial radiation for n&gt;0,</i><br><i>a<sub>c</sub> and b<sub>c</sub> are long wave coefficients for clear skies.</i><br><i>N is the maximum possible daylight hours</i><br>Simplified version (Allen et al., 1998)<br>$f = 0.9 \frac{n}{N} + 0.1$<br>Jensen, 1990<br>$f = a_c \frac{R_s}{S_0} + b_c$<br><i>With R<sub>s</sub> solar (short-wave) radiation (MJ m<sup>2</sup>/day)</i> |
| <i>G</i>  | Soil heat flux                | MJm <sup>-2</sup> month <sup>-1</sup> | Energy that moves from the surface to subsurface soil by conduction, depends on                                                                                                                                                                                                                                                                                                                                                                                                         | Monthly formulation (Shuttleworth, 1993)                                                                                                                                                                                                                                                                                                                                                                                                                                                                                                                                                                                                                                                                            |

| Symbol   | Variable name                      | Units                            | Description                                                                                                                                                                      | Formula                                                                                                                                                                                                                                                                                                                                                                                                                                                   |
|----------|------------------------------------|----------------------------------|----------------------------------------------------------------------------------------------------------------------------------------------------------------------------------|-----------------------------------------------------------------------------------------------------------------------------------------------------------------------------------------------------------------------------------------------------------------------------------------------------------------------------------------------------------------------------------------------------------------------------------------------------------|
|          |                                    |                                  | soil temperature fluctuations                                                                                                                                                    | $G = 0.14(T_{\text{month2}} - T_{\text{month1}})$                                                                                                                                                                                                                                                                                                                                                                                                         |
| $\gamma$ | Psychrometric constant (for water) | $\text{KPa}^\circ\text{C}^{-1}$  | Describes the thermodynamic properties of moist air at a constant pressure. Relates the partial pressure of water in the air to the air temperature                              | Shuttleworth, 1993<br>$\gamma = \frac{c_p P}{\epsilon \lambda}$ <p><i>With <math>c_p</math> specific heat of moist air</i><br/> <math>c_p = 1.013 \times 10^{-3} \text{MJkg}^{-1}\text{C}^{-1}</math><br/> <i>P atmospheric pressure</i><br/> <math>\epsilon</math> ratio of molecular weight of water vapour to that of dry air:<br/> <math>\epsilon = 0.622</math></p>                                                                                  |
| $S_0$    | Extraterrestrial radiation         | $\text{MJm}^{-2}\text{day}^{-1}$ | The amount of solar energy that reaches the top of the atmosphere. Depends on angle of sun radiation and length of day.                                                          | Shuttleworth, 1993<br>$S_0 = 37.62d_r(\omega_s \sin\phi \sin\delta + \cos\phi \cos\delta \sin\omega_s)$                                                                                                                                                                                                                                                                                                                                                   |
| $R_s$    | Solar radiation                    | $\text{MJm}^{-2}\text{day}^{-1}$ | Amount of energy measured at the earth's surface including direct and diffuse short-wave radiation                                                                               | Generalised form (Jensen et al., 1990)<br>$R_s = S_0(a_s + b_s \frac{n}{N})$ <p>Here <math>a_s = 0.25</math> and <math>b_s = 0.50</math></p>                                                                                                                                                                                                                                                                                                              |
| $R_{ns}$ | Net solar radiation                | $\text{MJm}^{-2}\text{day}^{-1}$ | That part of the incident short wave radiation that is captured at the ground (reflection losses are taken into account), in other words, the absorbed incoming solar radiation. | Shuttleworth, 1993<br>$R_{ns} = (1 - \alpha)R_s$ <p><i>With <math>\alpha</math> albedo</i></p>                                                                                                                                                                                                                                                                                                                                                            |
| $R_{nl}$ | Net long-wave radiation            | $\text{MJm}^{-2}\text{day}^{-1}$ | Incoming (atmosphere to ground) minus outgoing (ground to atmosphere) long-wave radiation                                                                                        | $R_{nl} = \epsilon' \sigma T^4$ <p><i>With <math>\epsilon'</math> net emissivity between atmosphere and ground (given for average conditions):</i><br/> <math display="block">\epsilon' = 0.34 - 0.139\sqrt{e_a}</math> <p><i><math>\sigma</math> Stefan-Boltzmann constant:</i><br/> <math display="block">\sigma = 4.903 \times 10^{-9} \text{MJm}^{-2}\text{day}^{-1}</math><br/> <i>T mean air temperature in <math>^\circ\text{K}</math></i></p></p> |
| $R_n$    | Net radiation                      | $\text{MJm}^2/\text{day}$        | Difference between the net solar radiation and the long-wave radiation                                                                                                           | $R_n = R_{ns} - R_{nl}$                                                                                                                                                                                                                                                                                                                                                                                                                                   |

1 Maps of mean MORECS PET and PET derived from HadRM3-Q0 for the 1961-1990 period

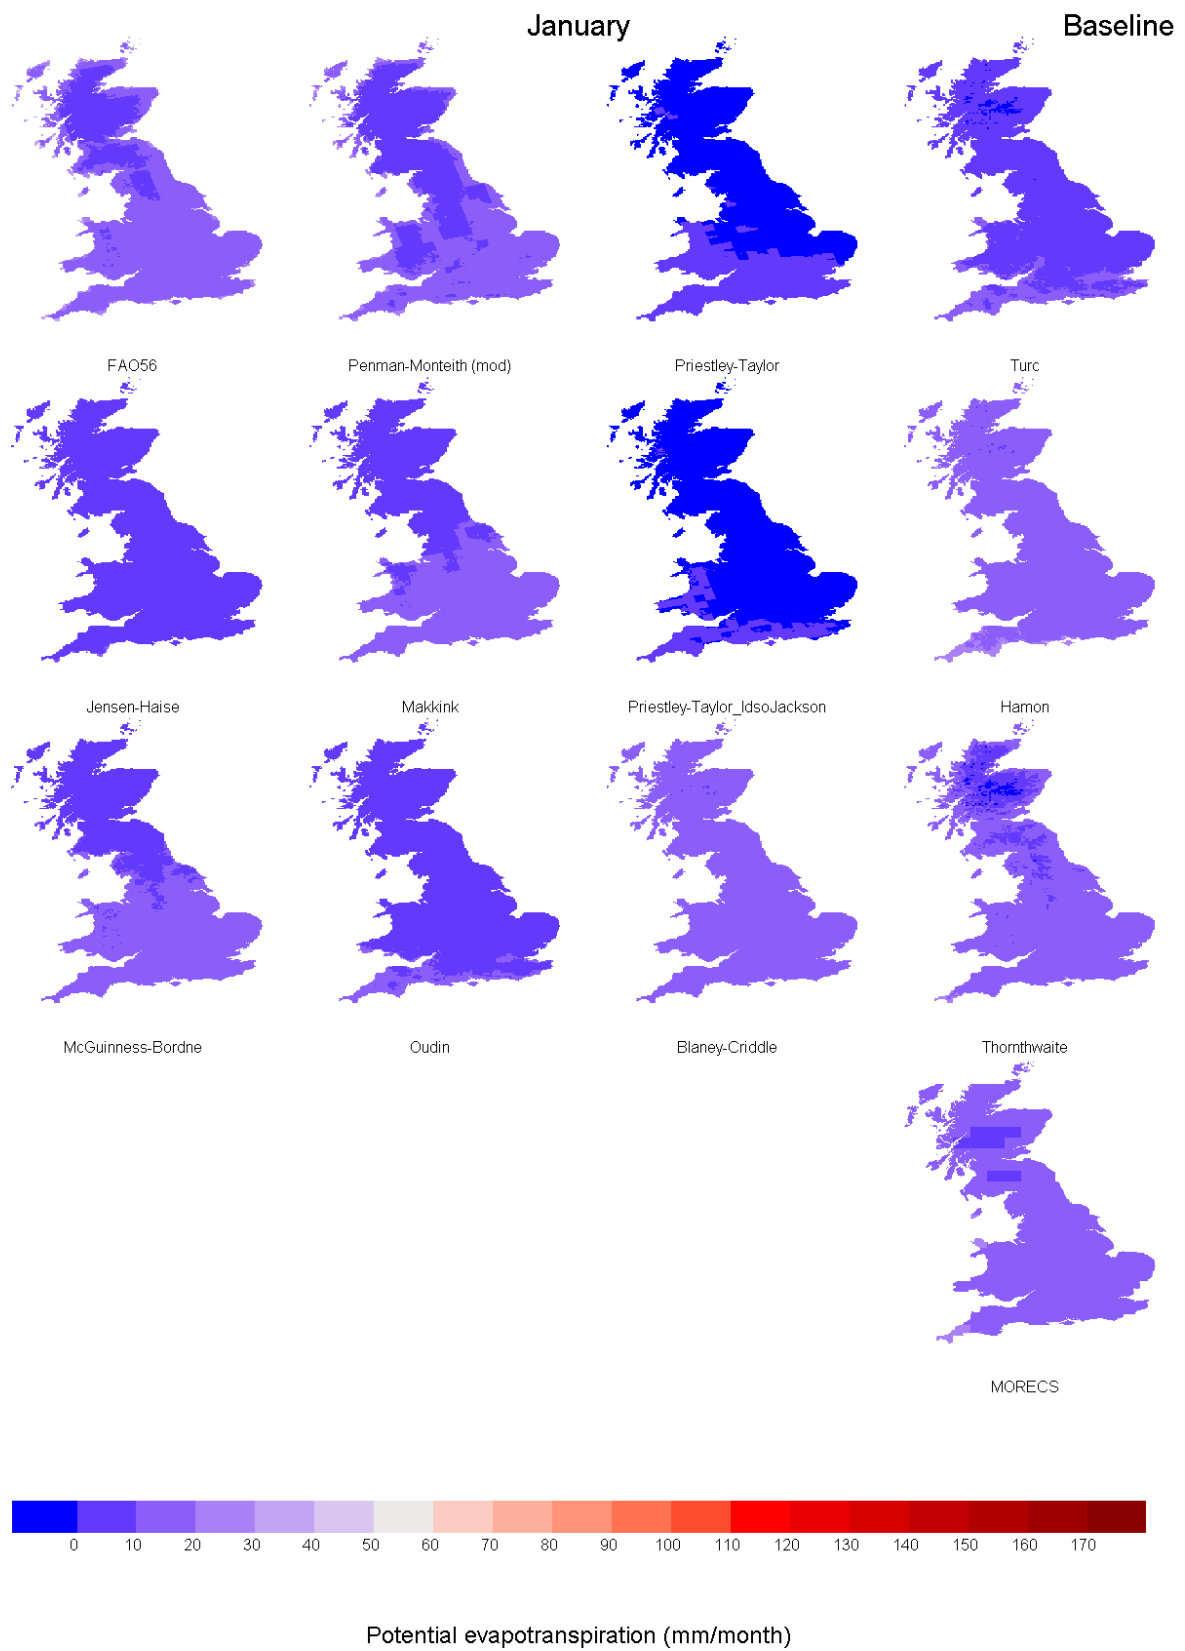

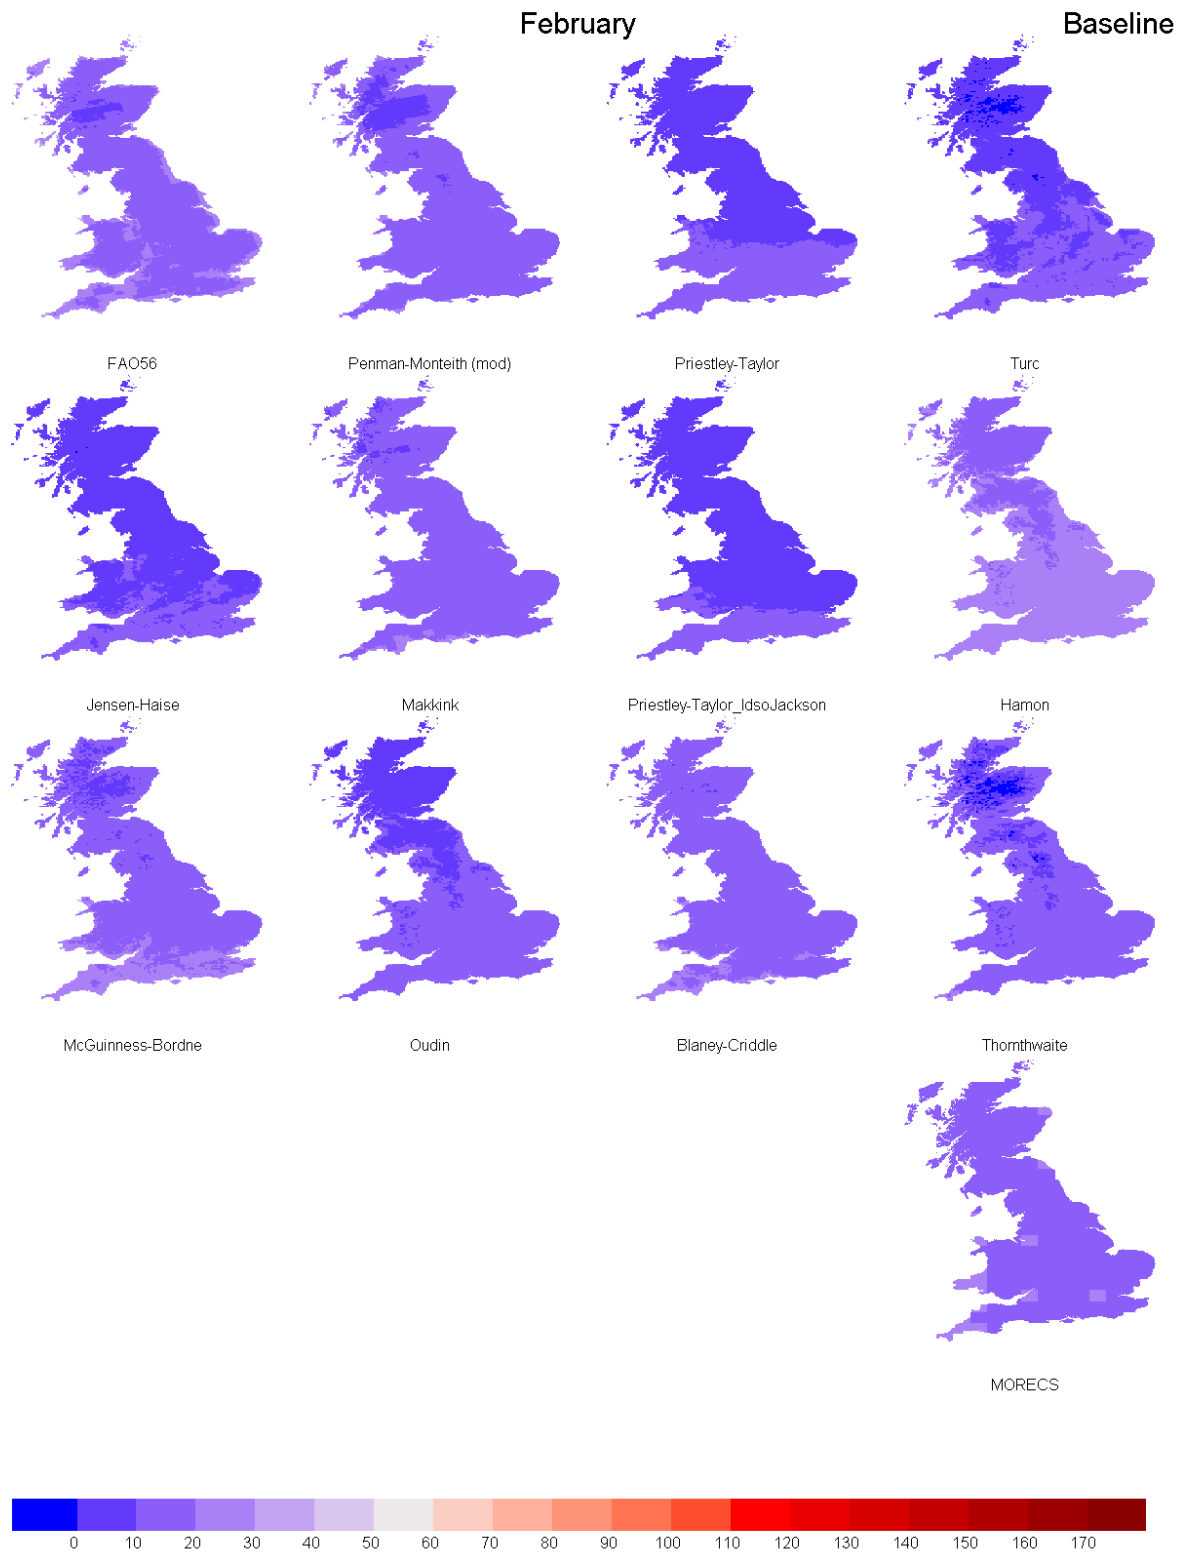

Potential evapotranspiration (mm/month)

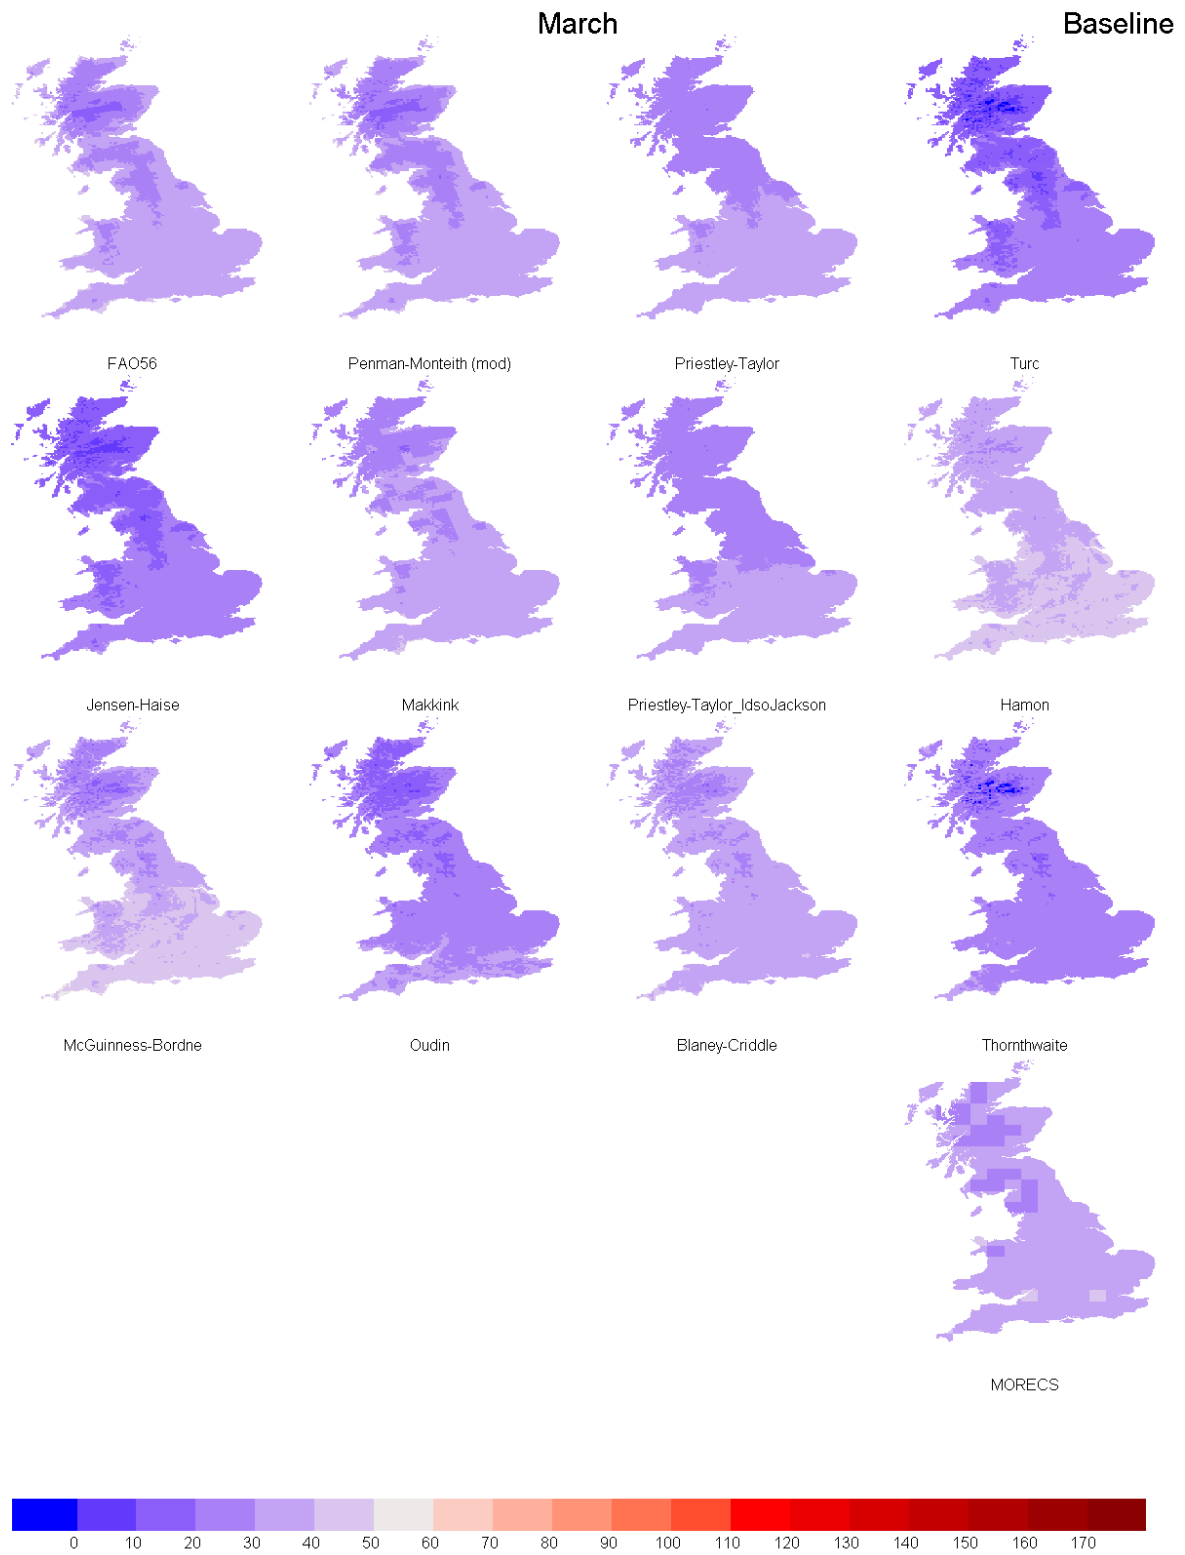

Potential evapotranspiration (mm/month)



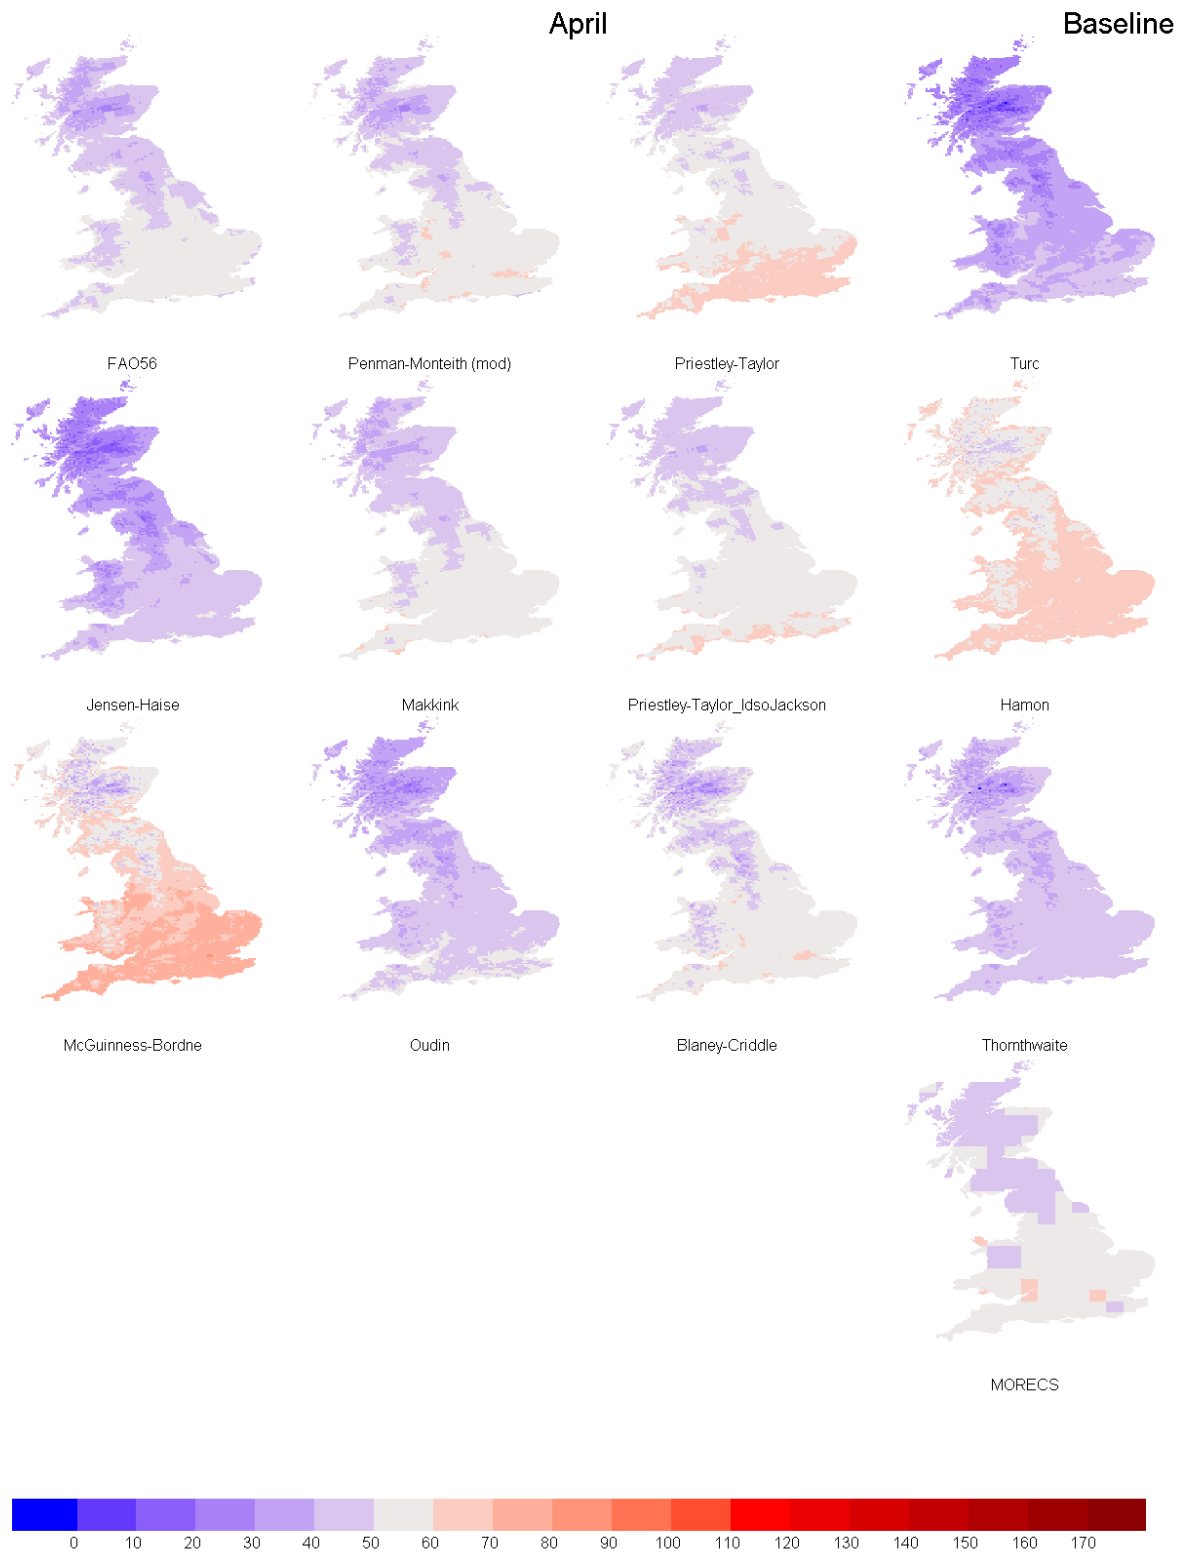

Potential evapotranspiration (mm/month)

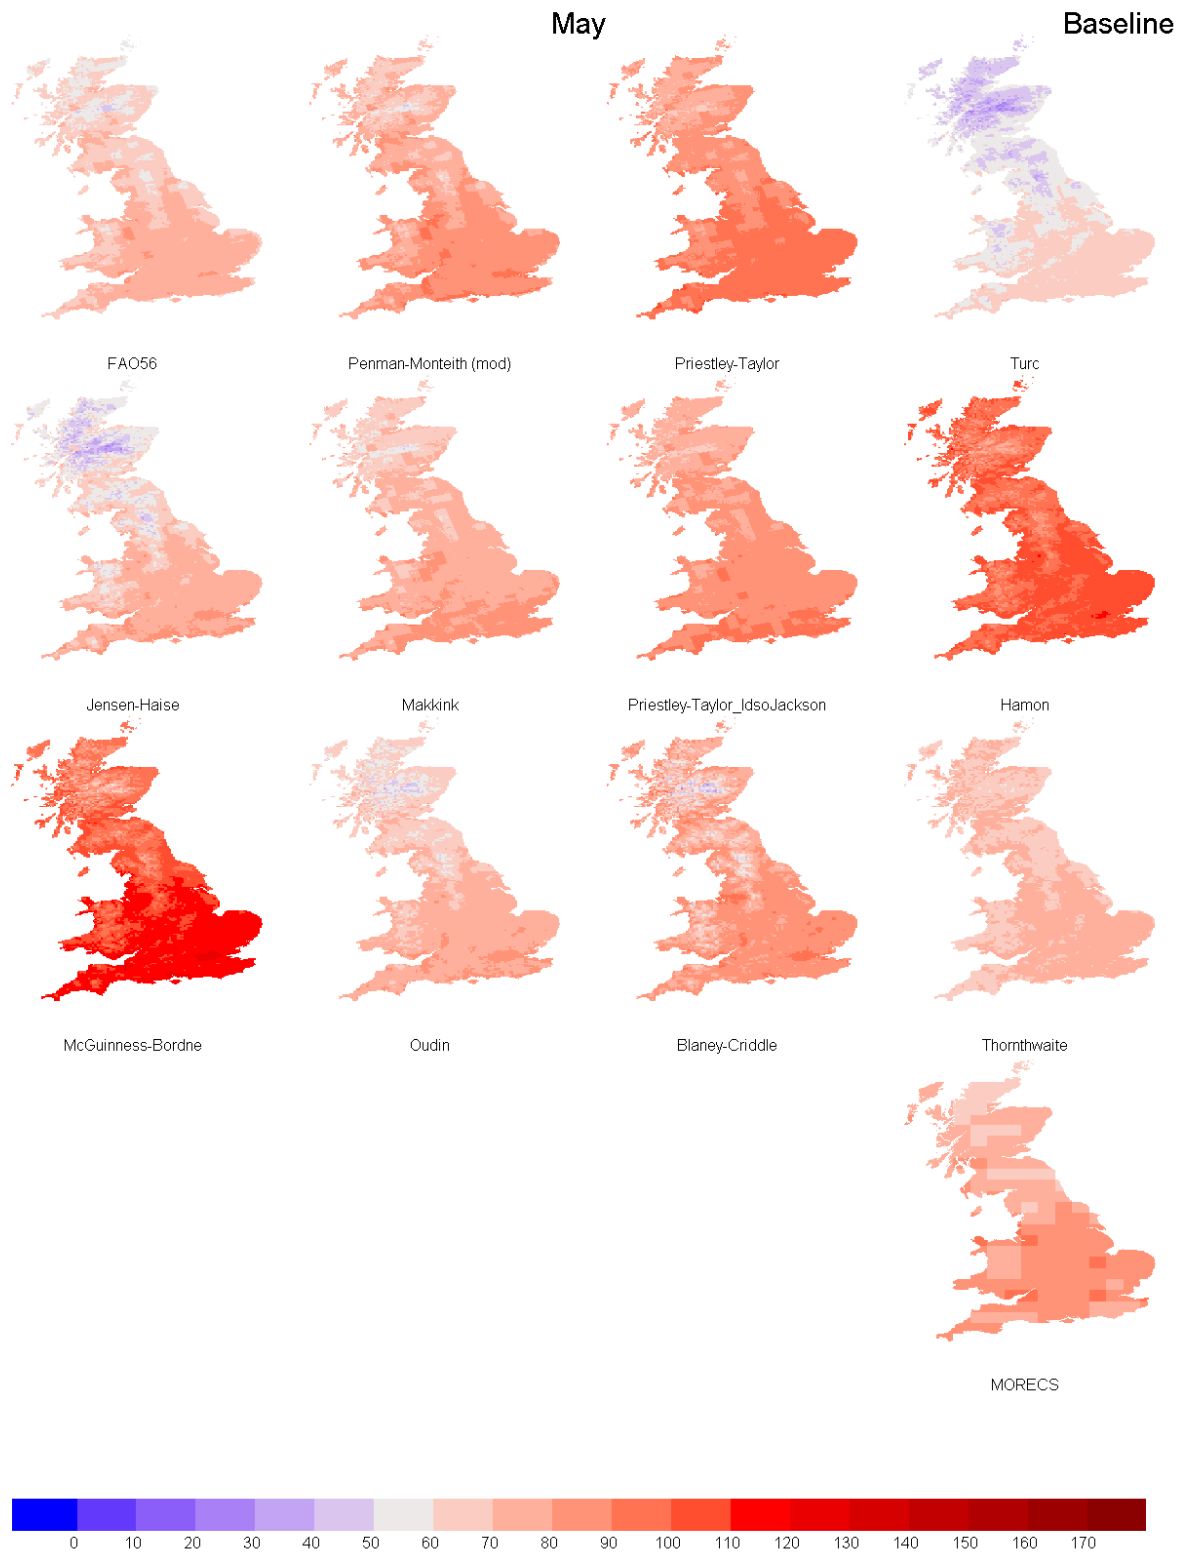

Potential evapotranspiration (mm/month)

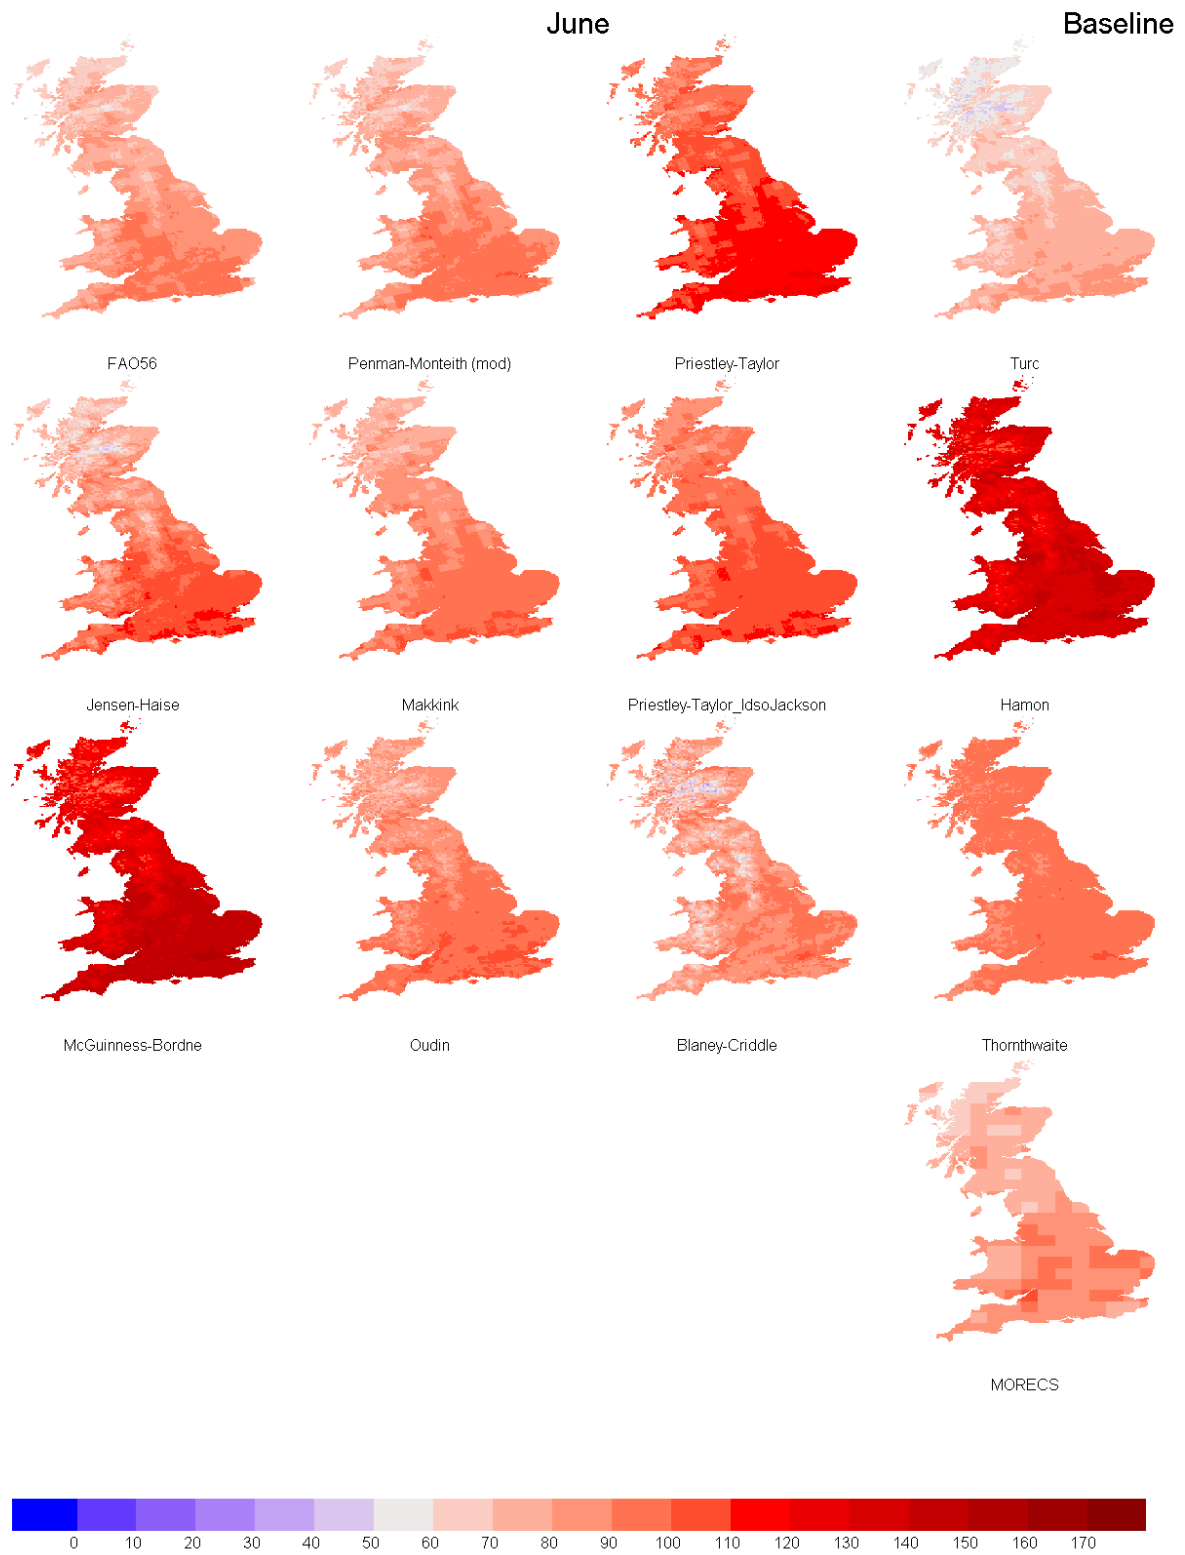

Potential evapotranspiration (mm/month)

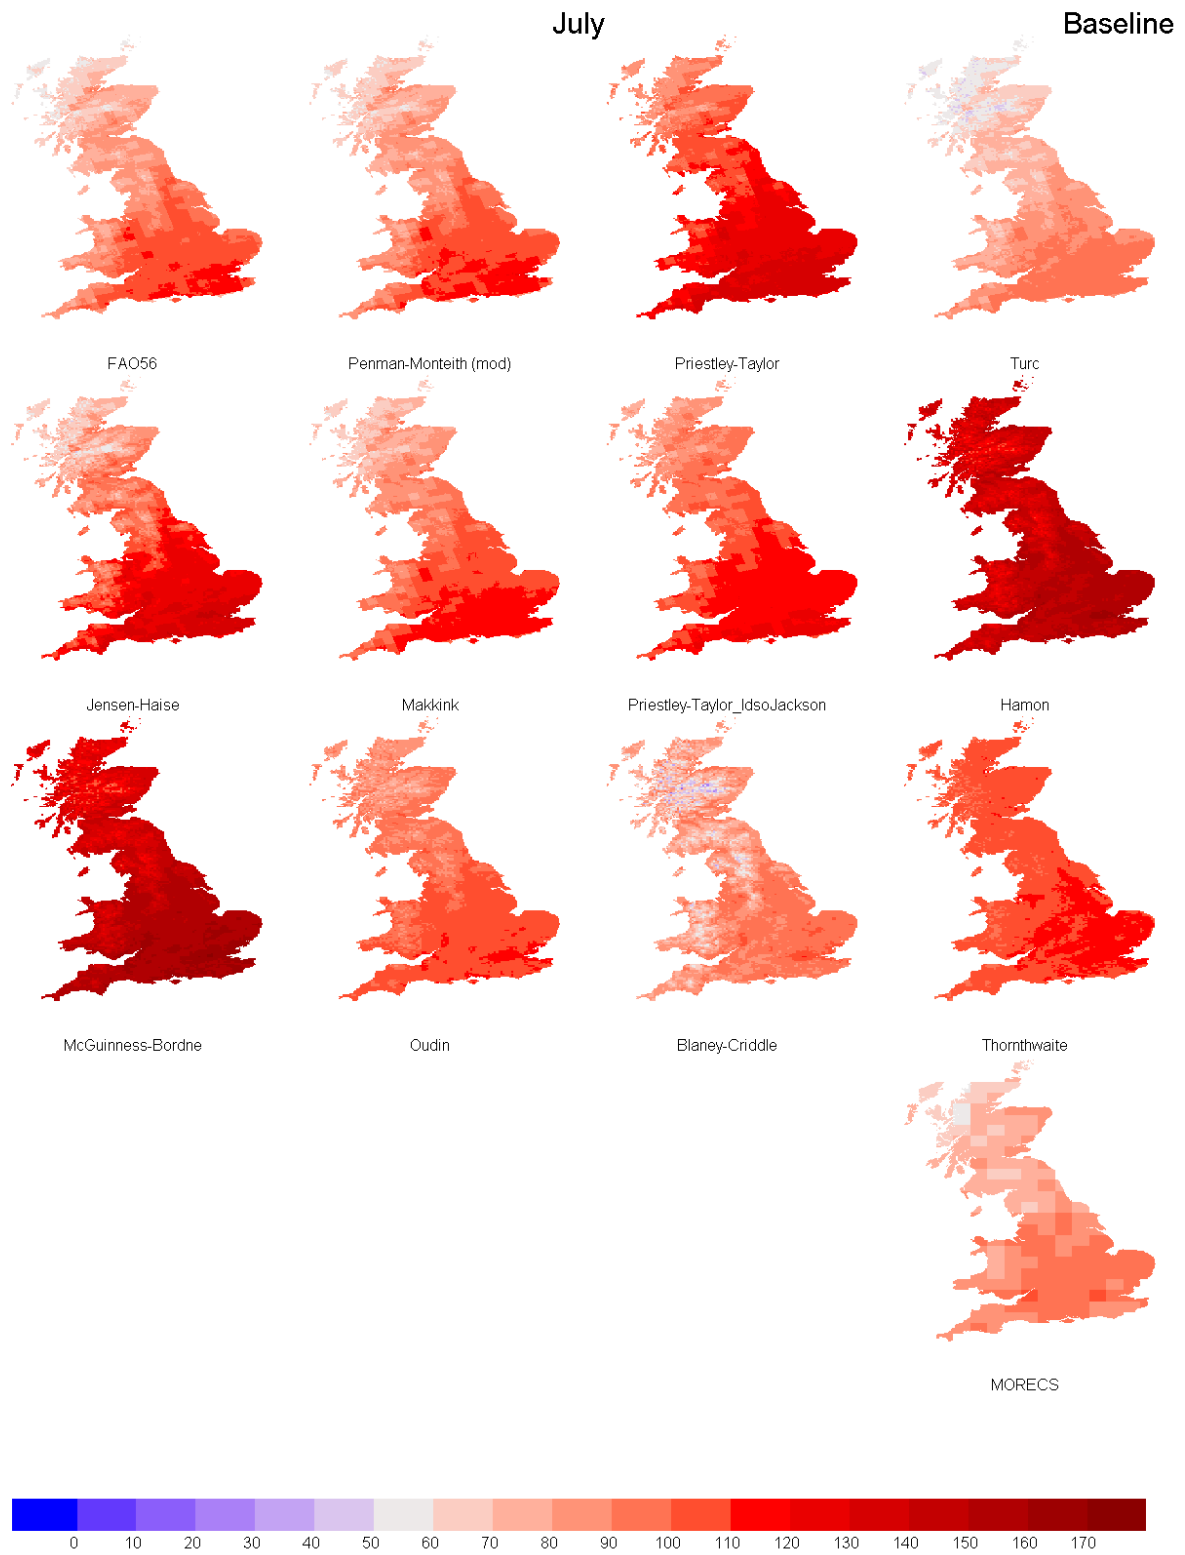

Potential evapotranspiration (mm/month)

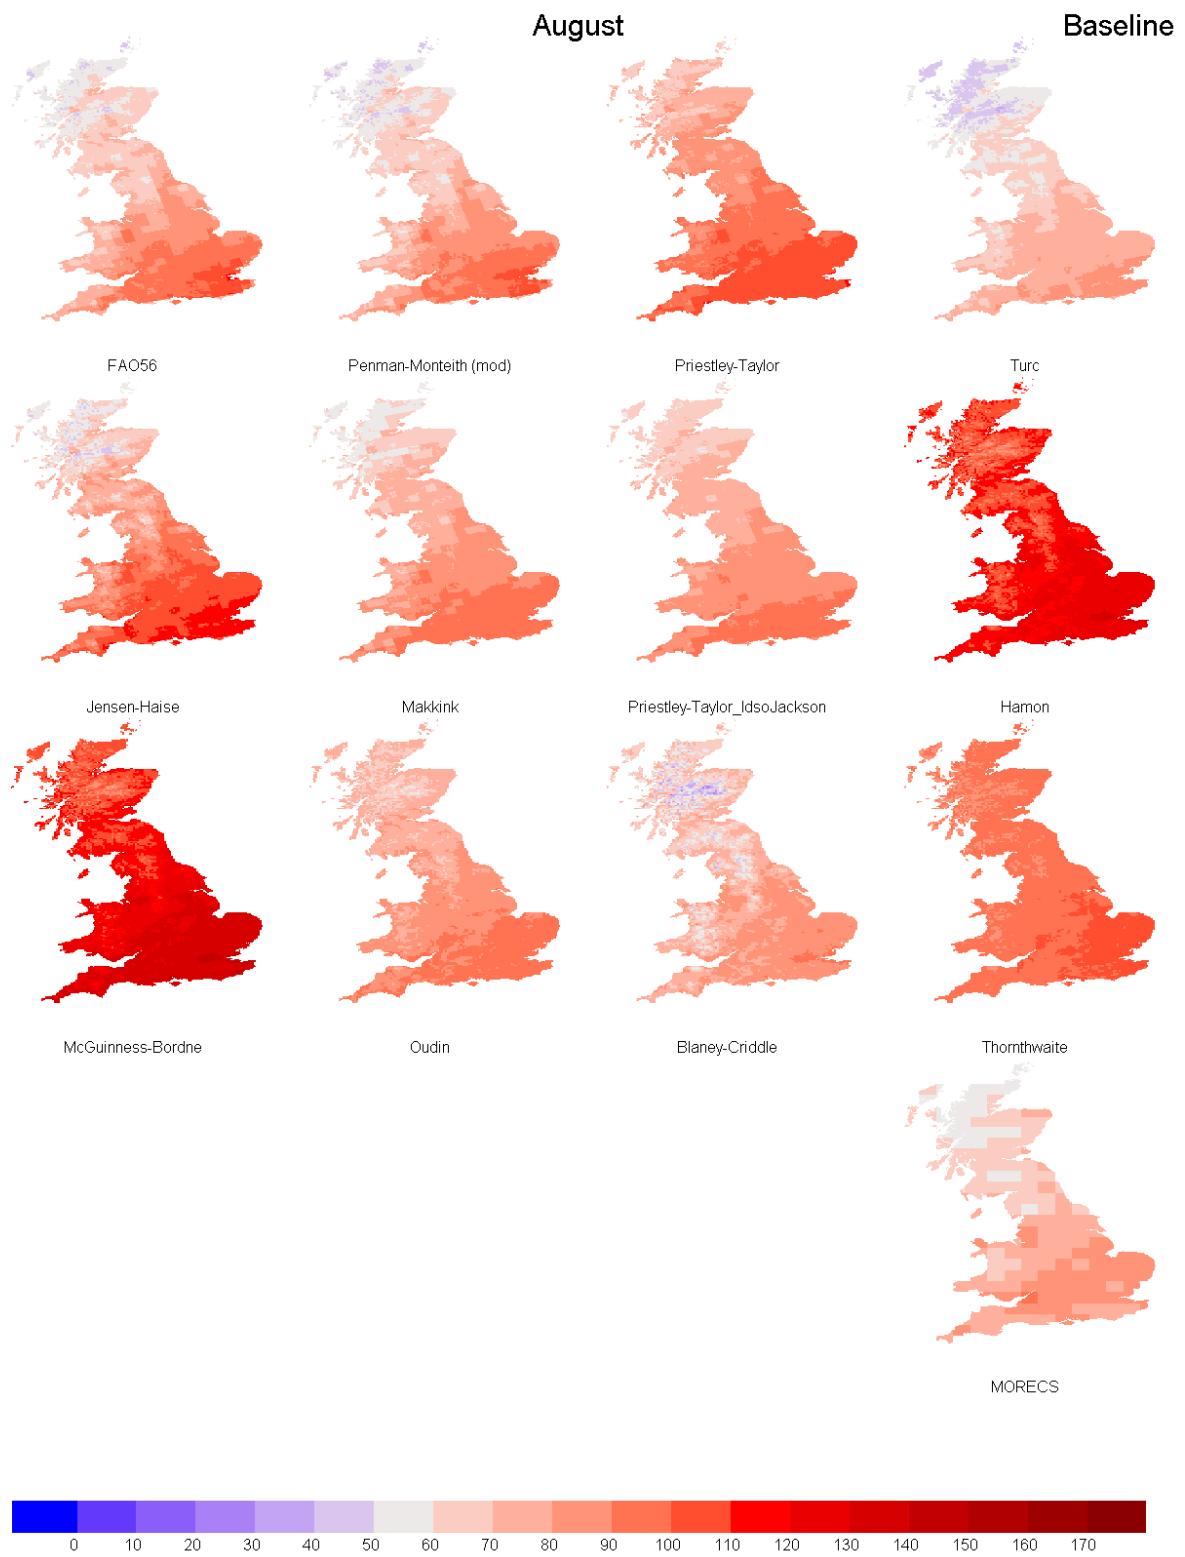

Potential evapotranspiration (mm/month)

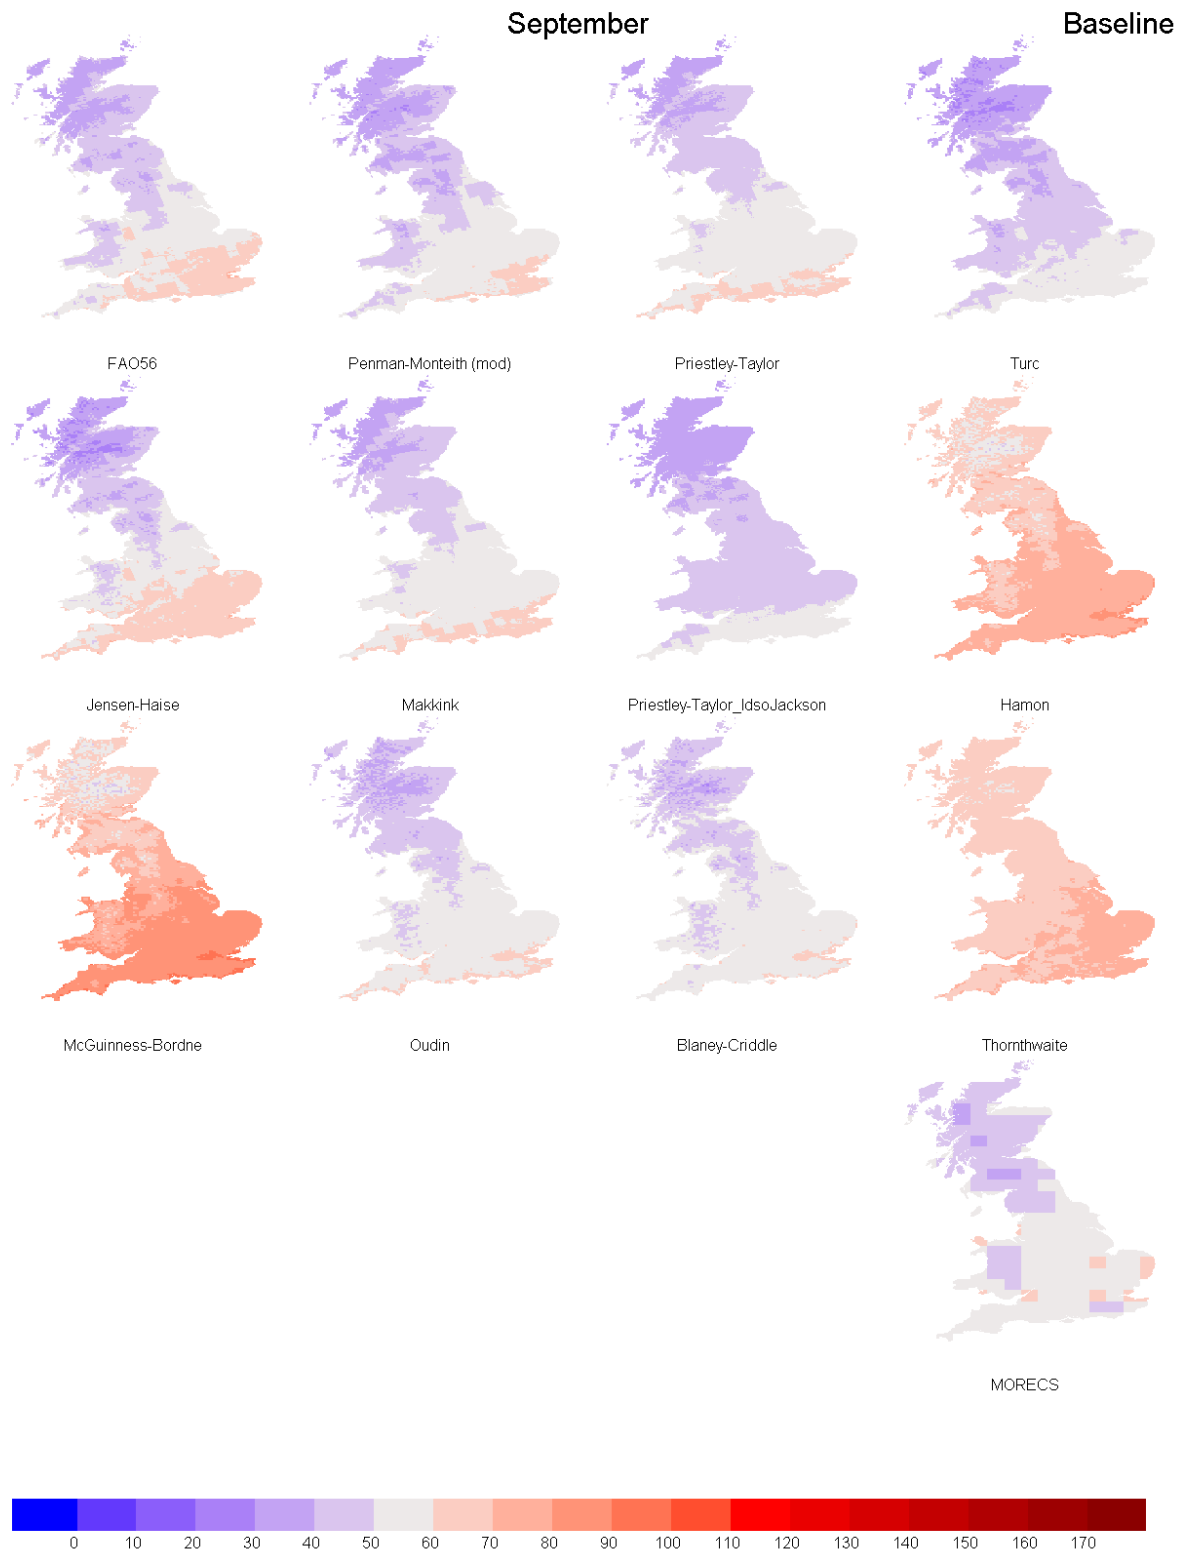

Potential evapotranspiration (mm/month)

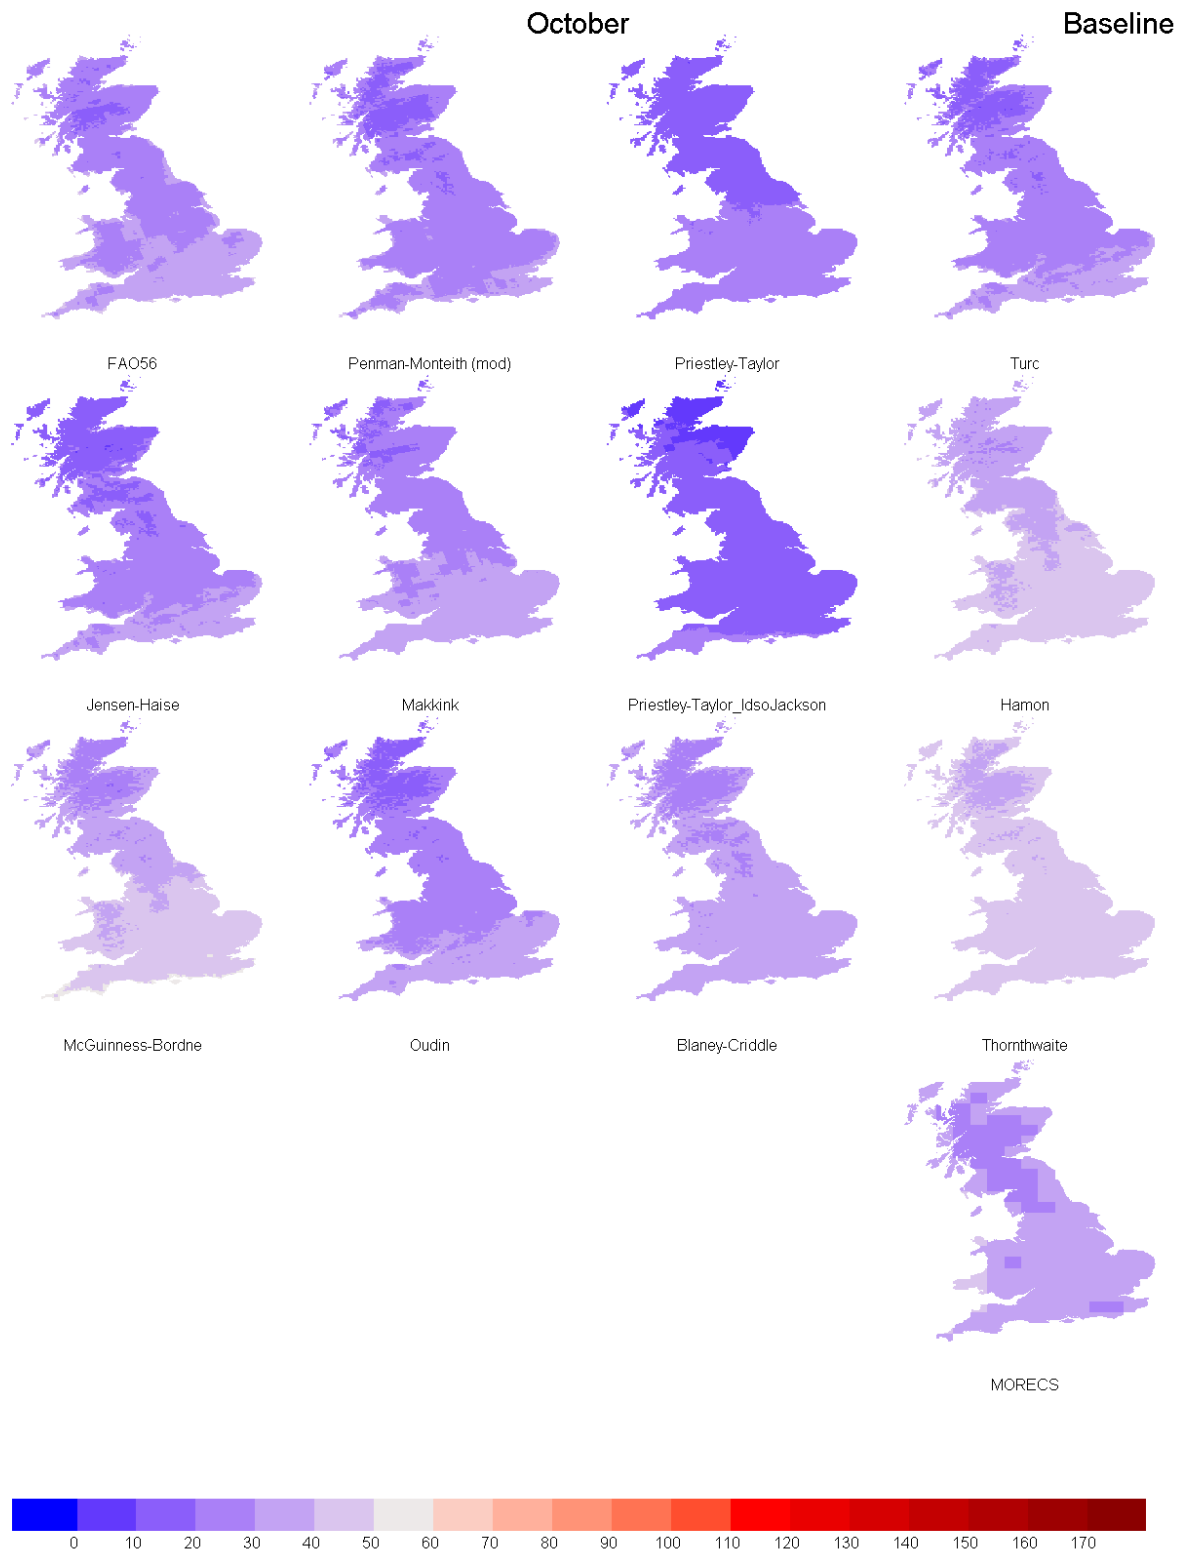

Potential evapotranspiration (mm/month)

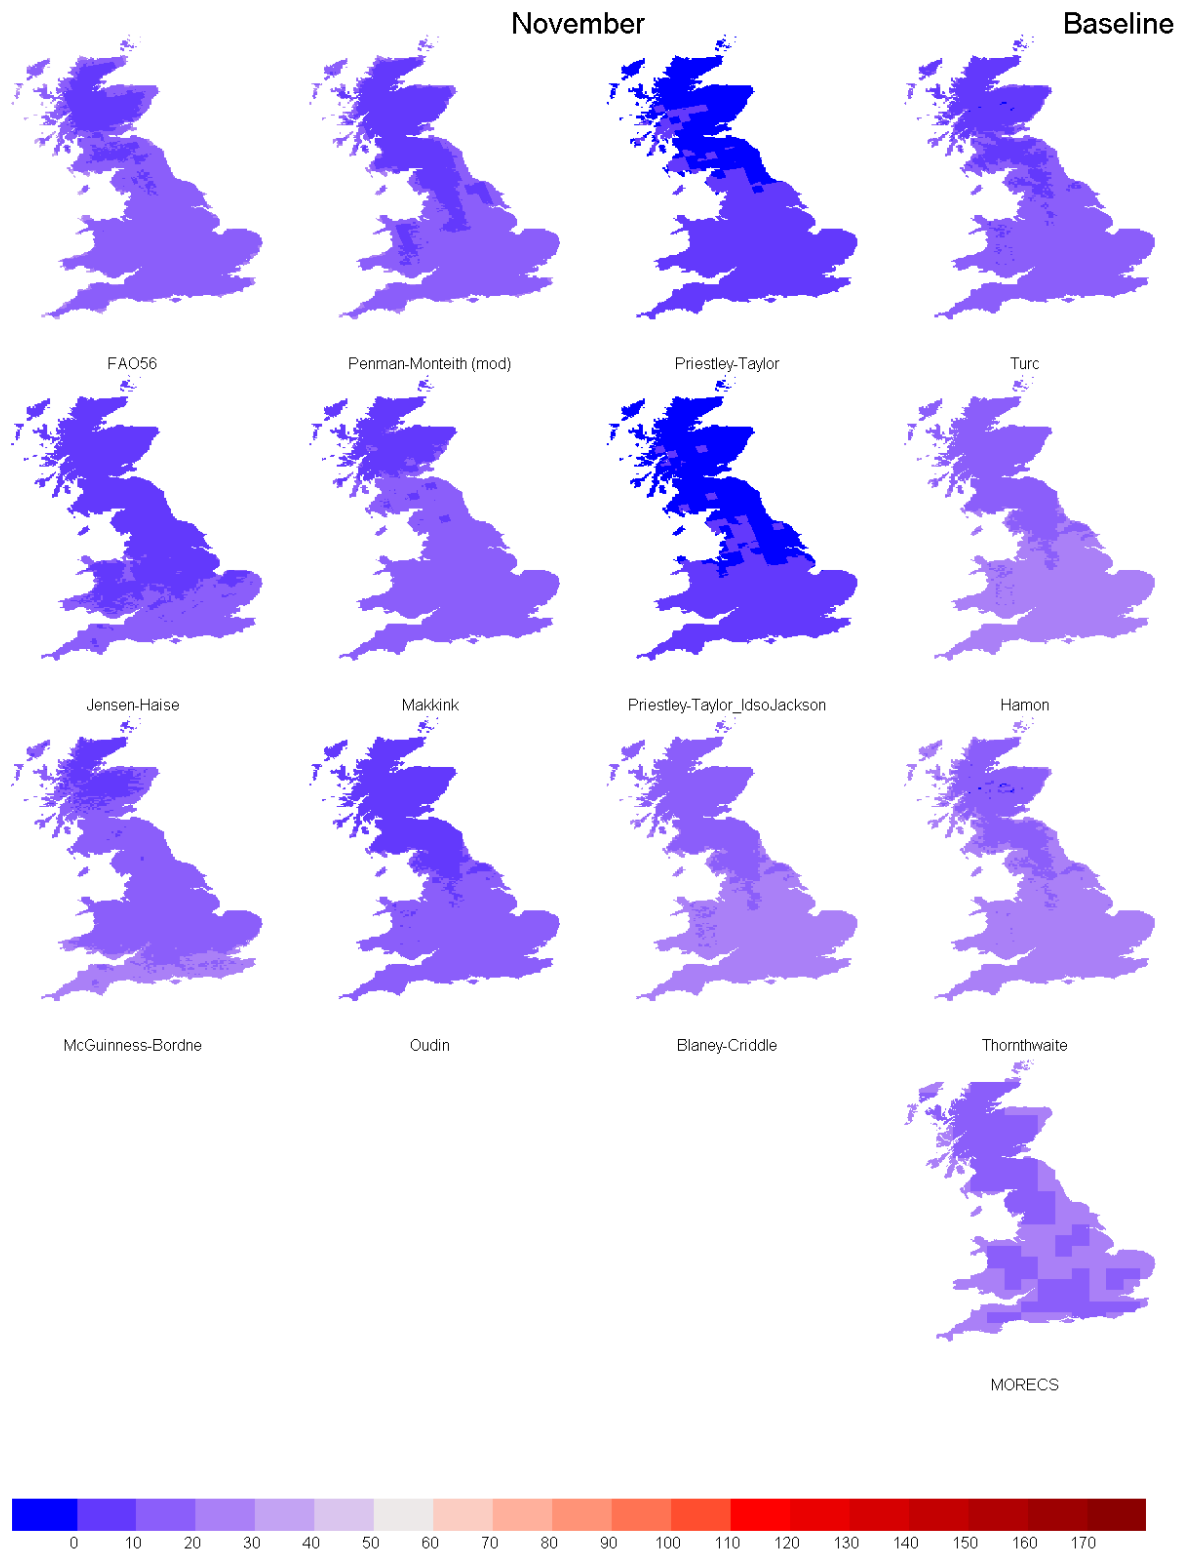



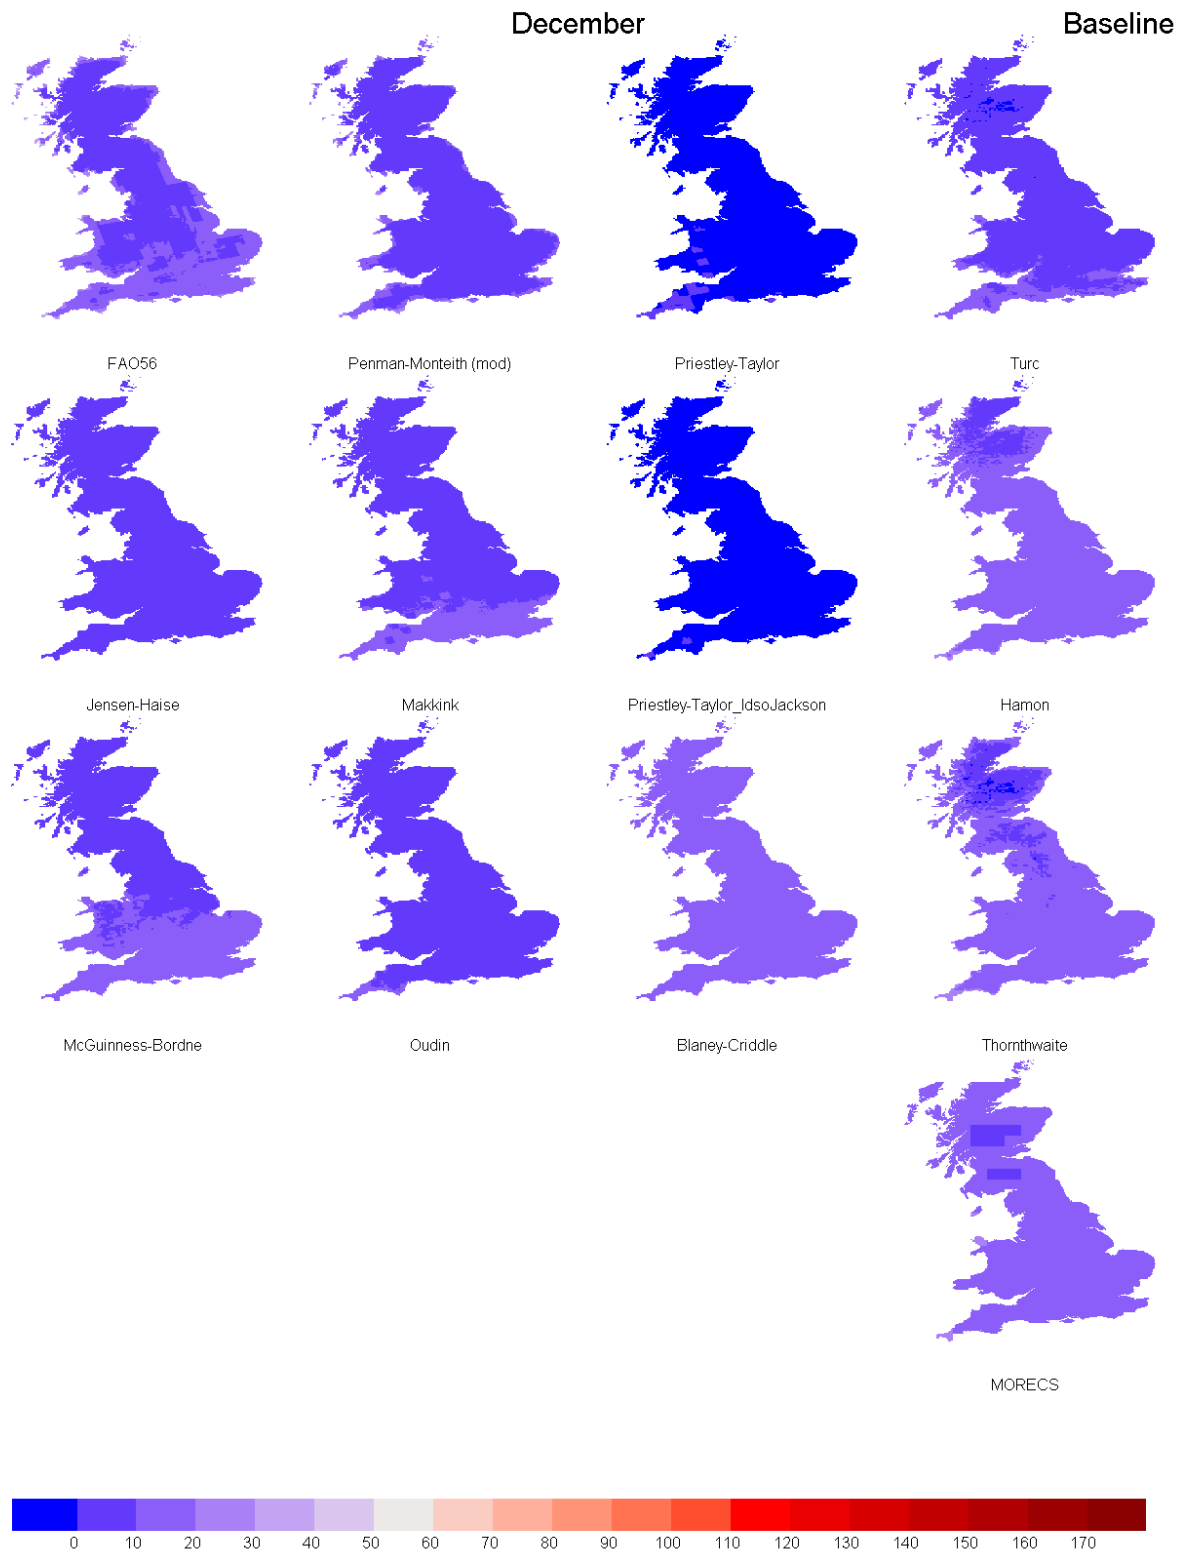

Potential evapotranspiration (mm/month)

1

2

- 1 PET percentage change between averages values calculated for the 1961-1990 and 2040-2069
- 2 time slices from HadRM3-Q0

January

2050s

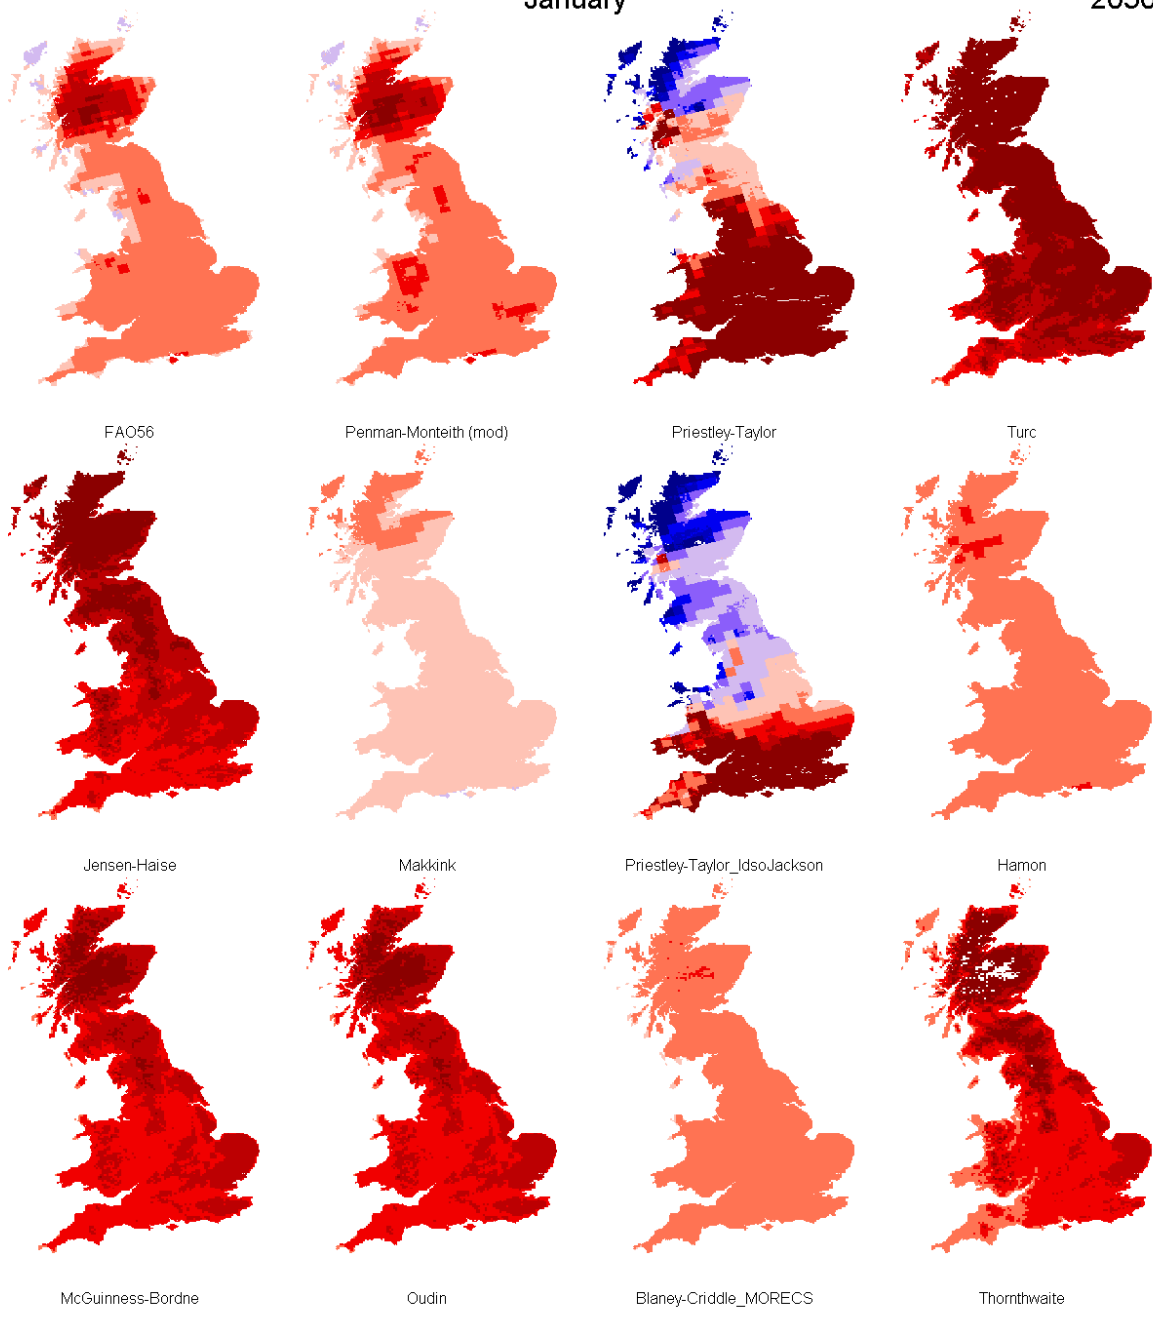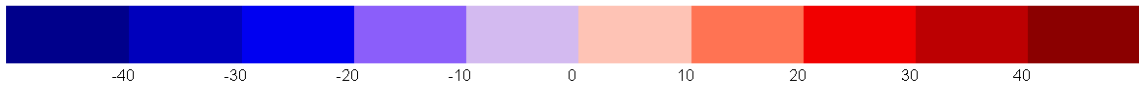

Potential evapotranspiration changes (%)

February

2050s

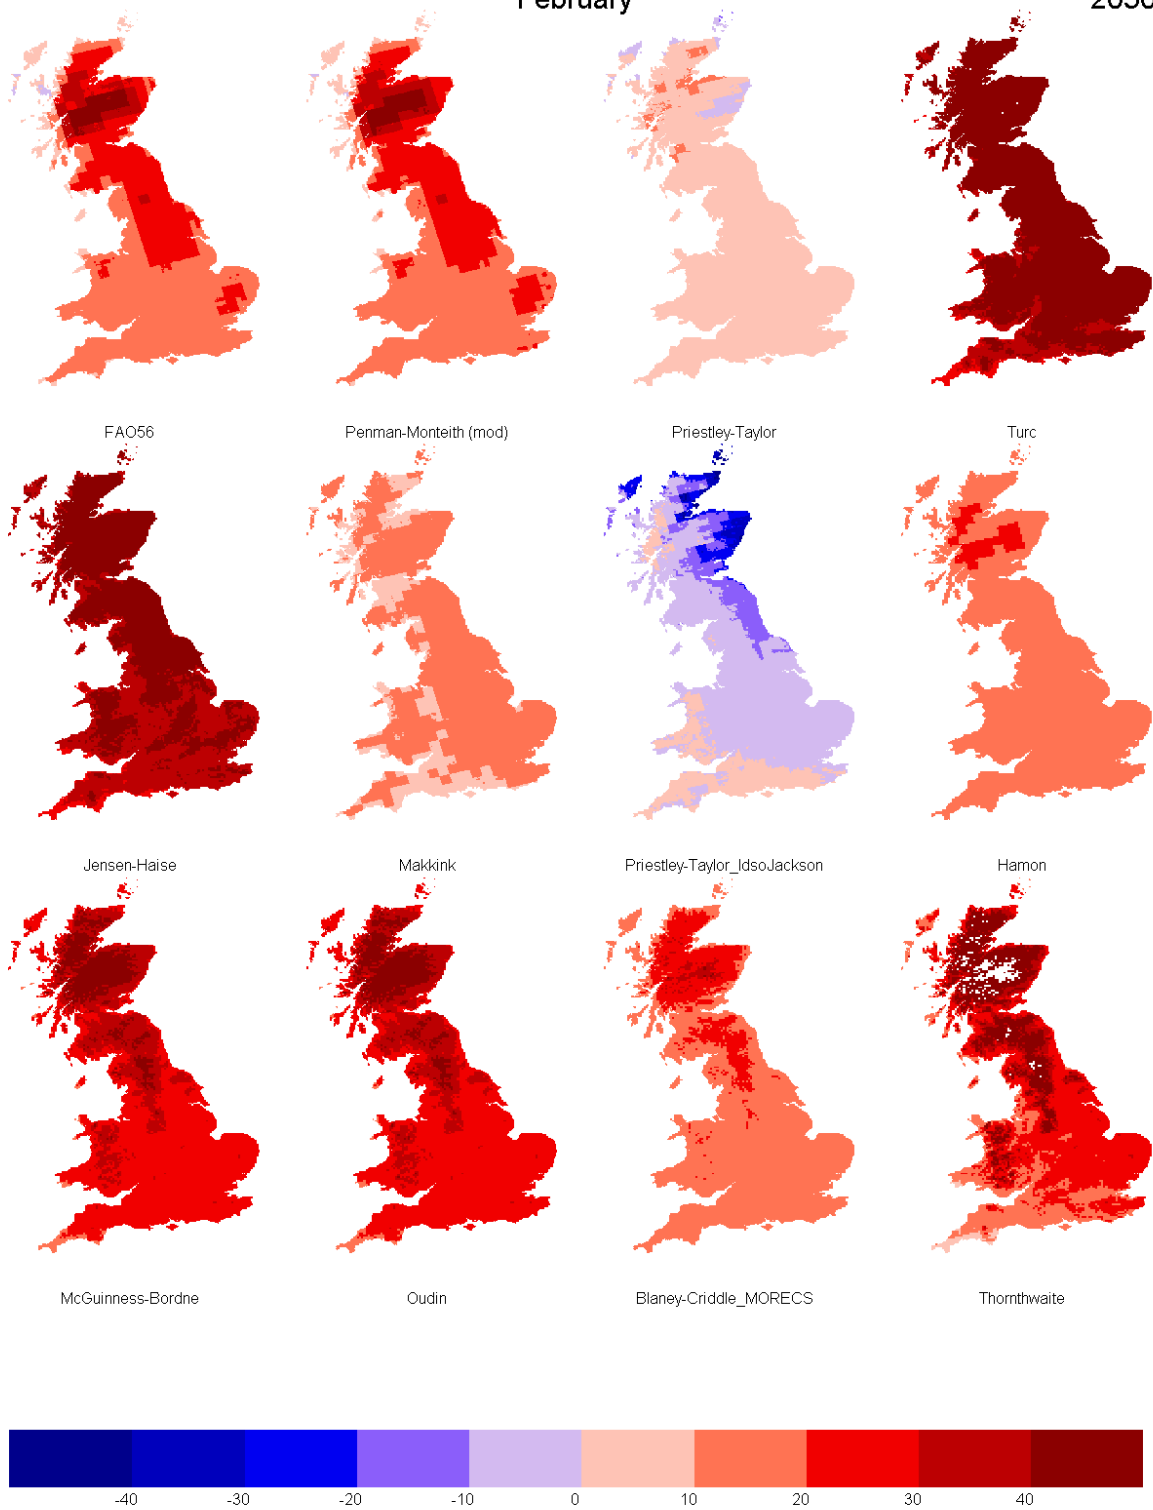

Potential evapotranspiration changes (%)

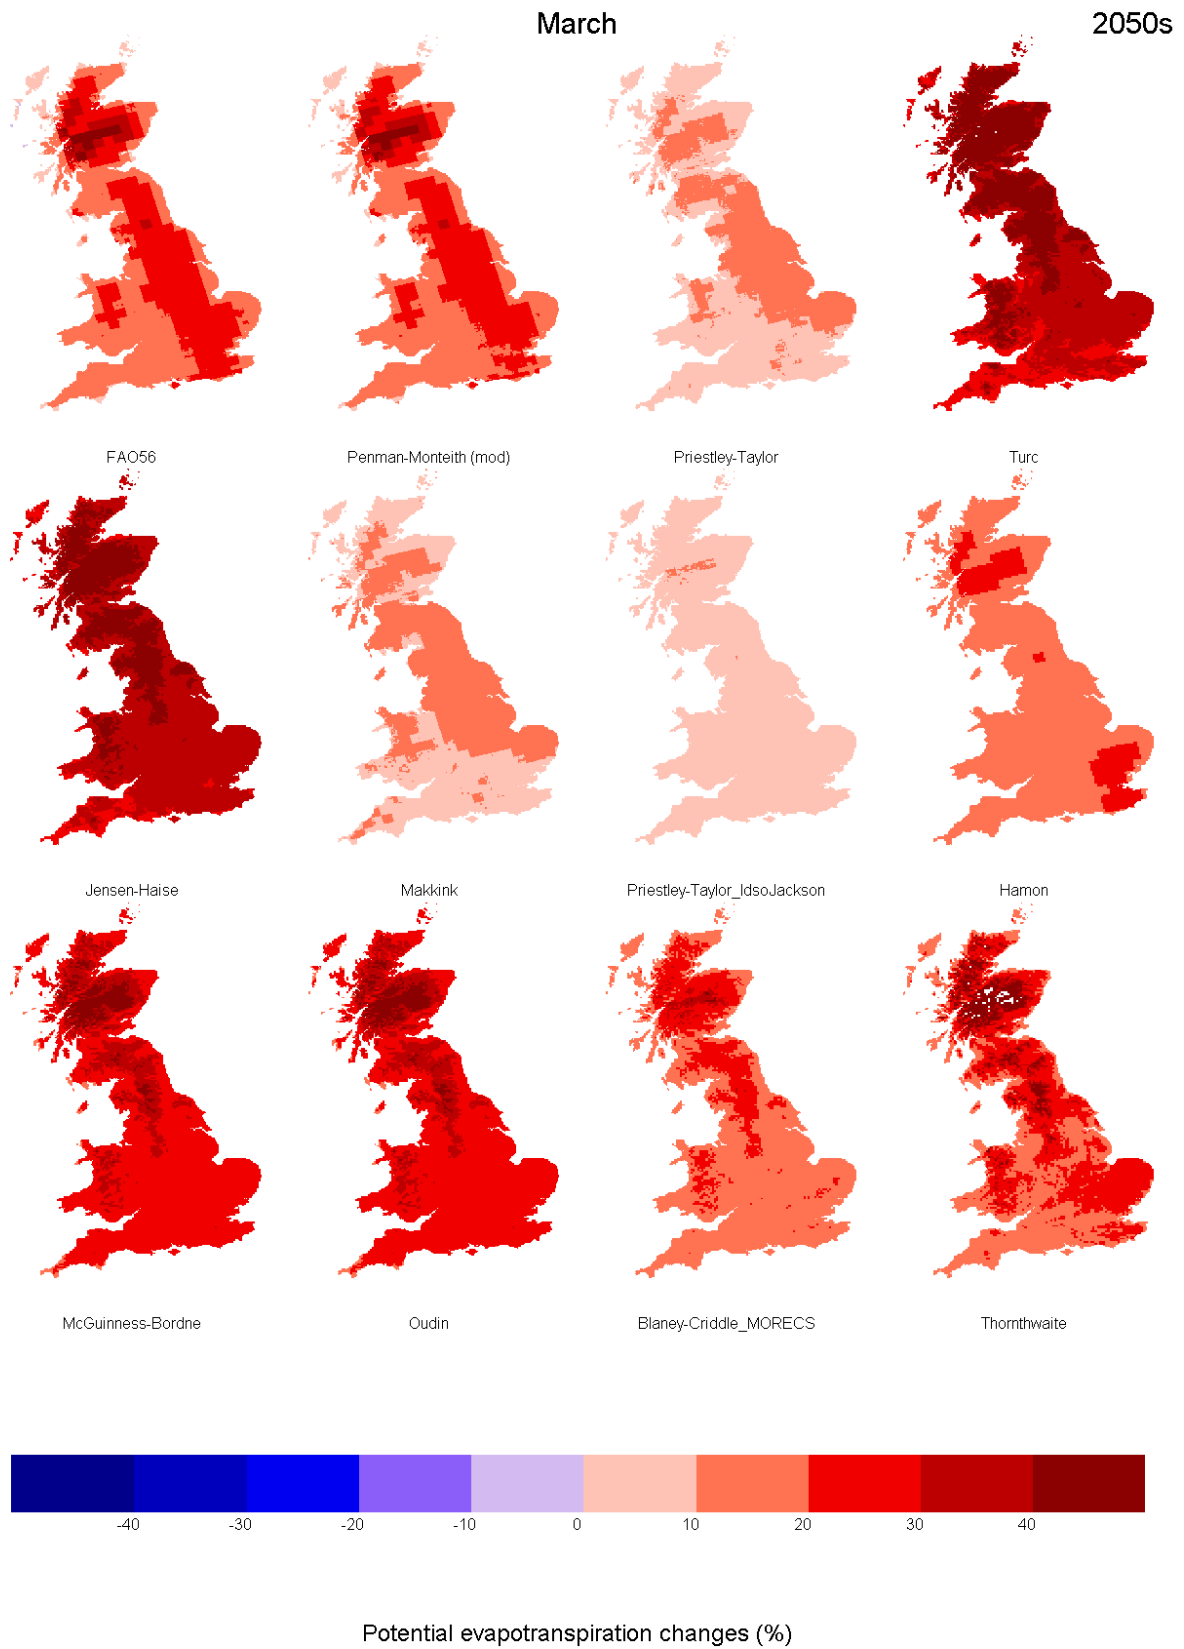

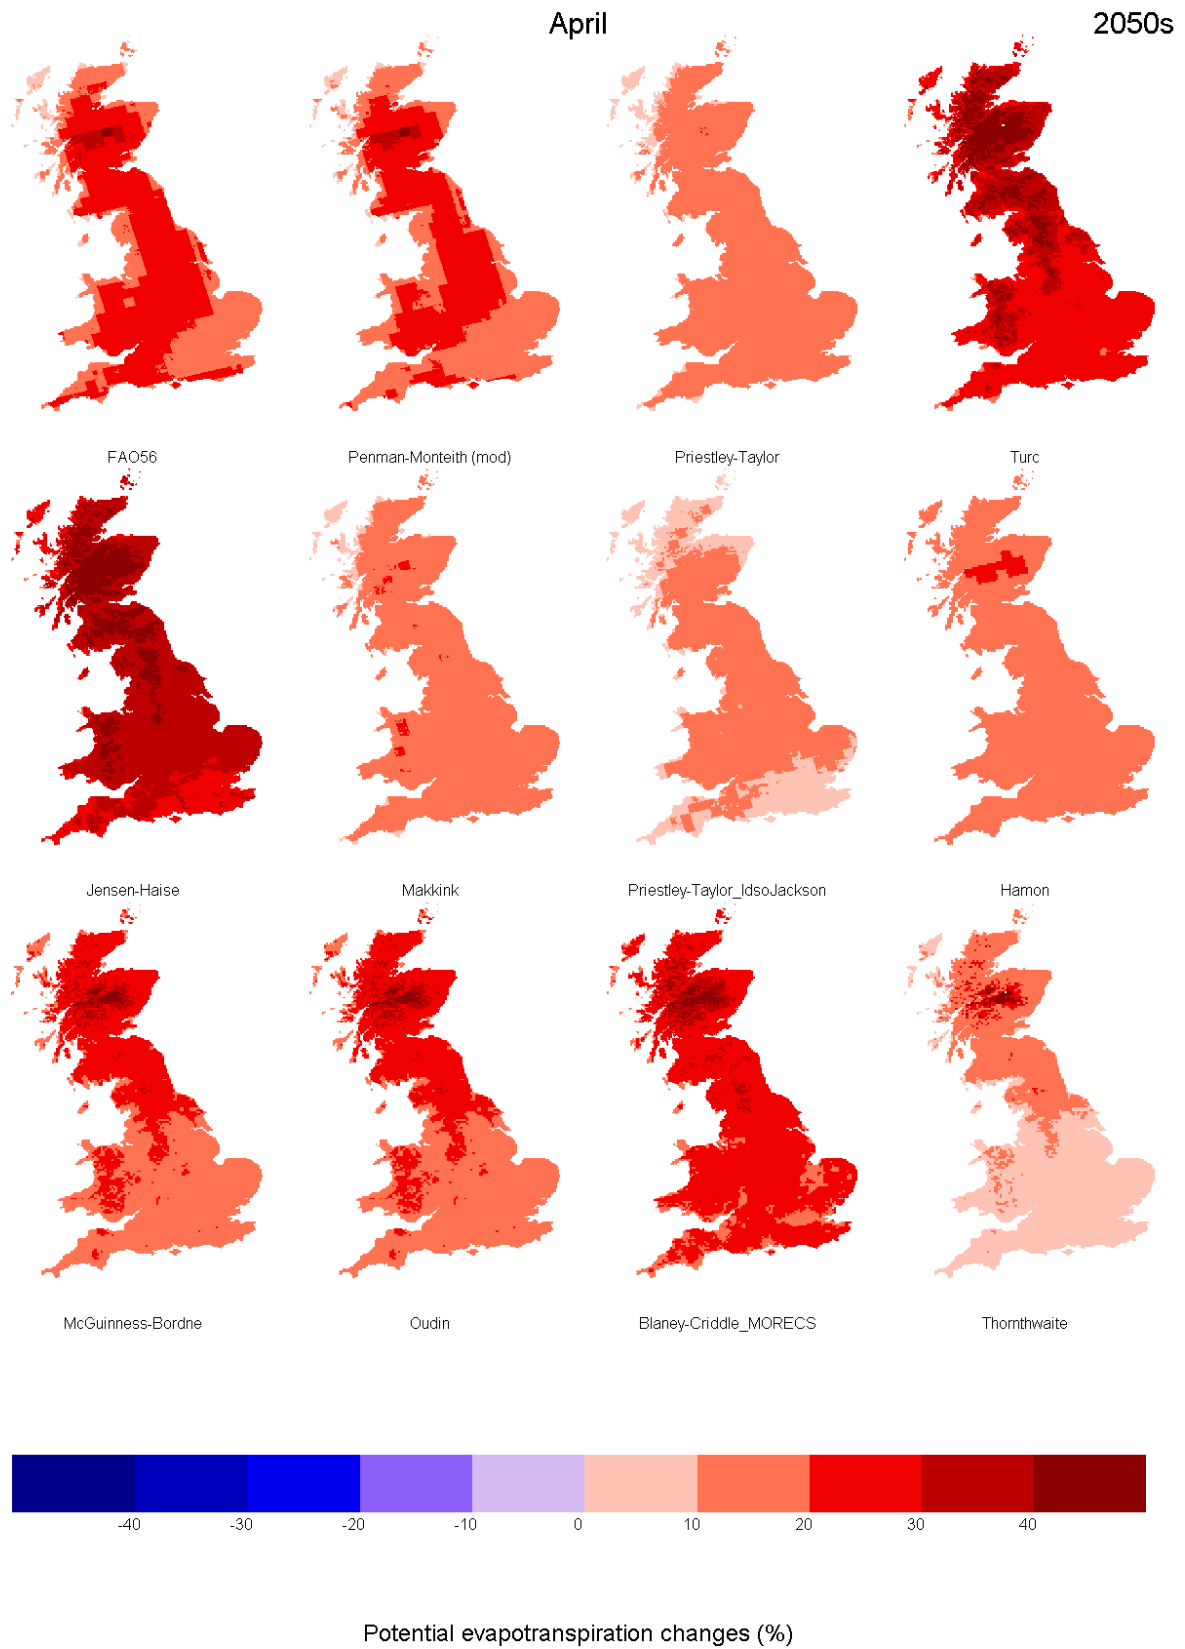

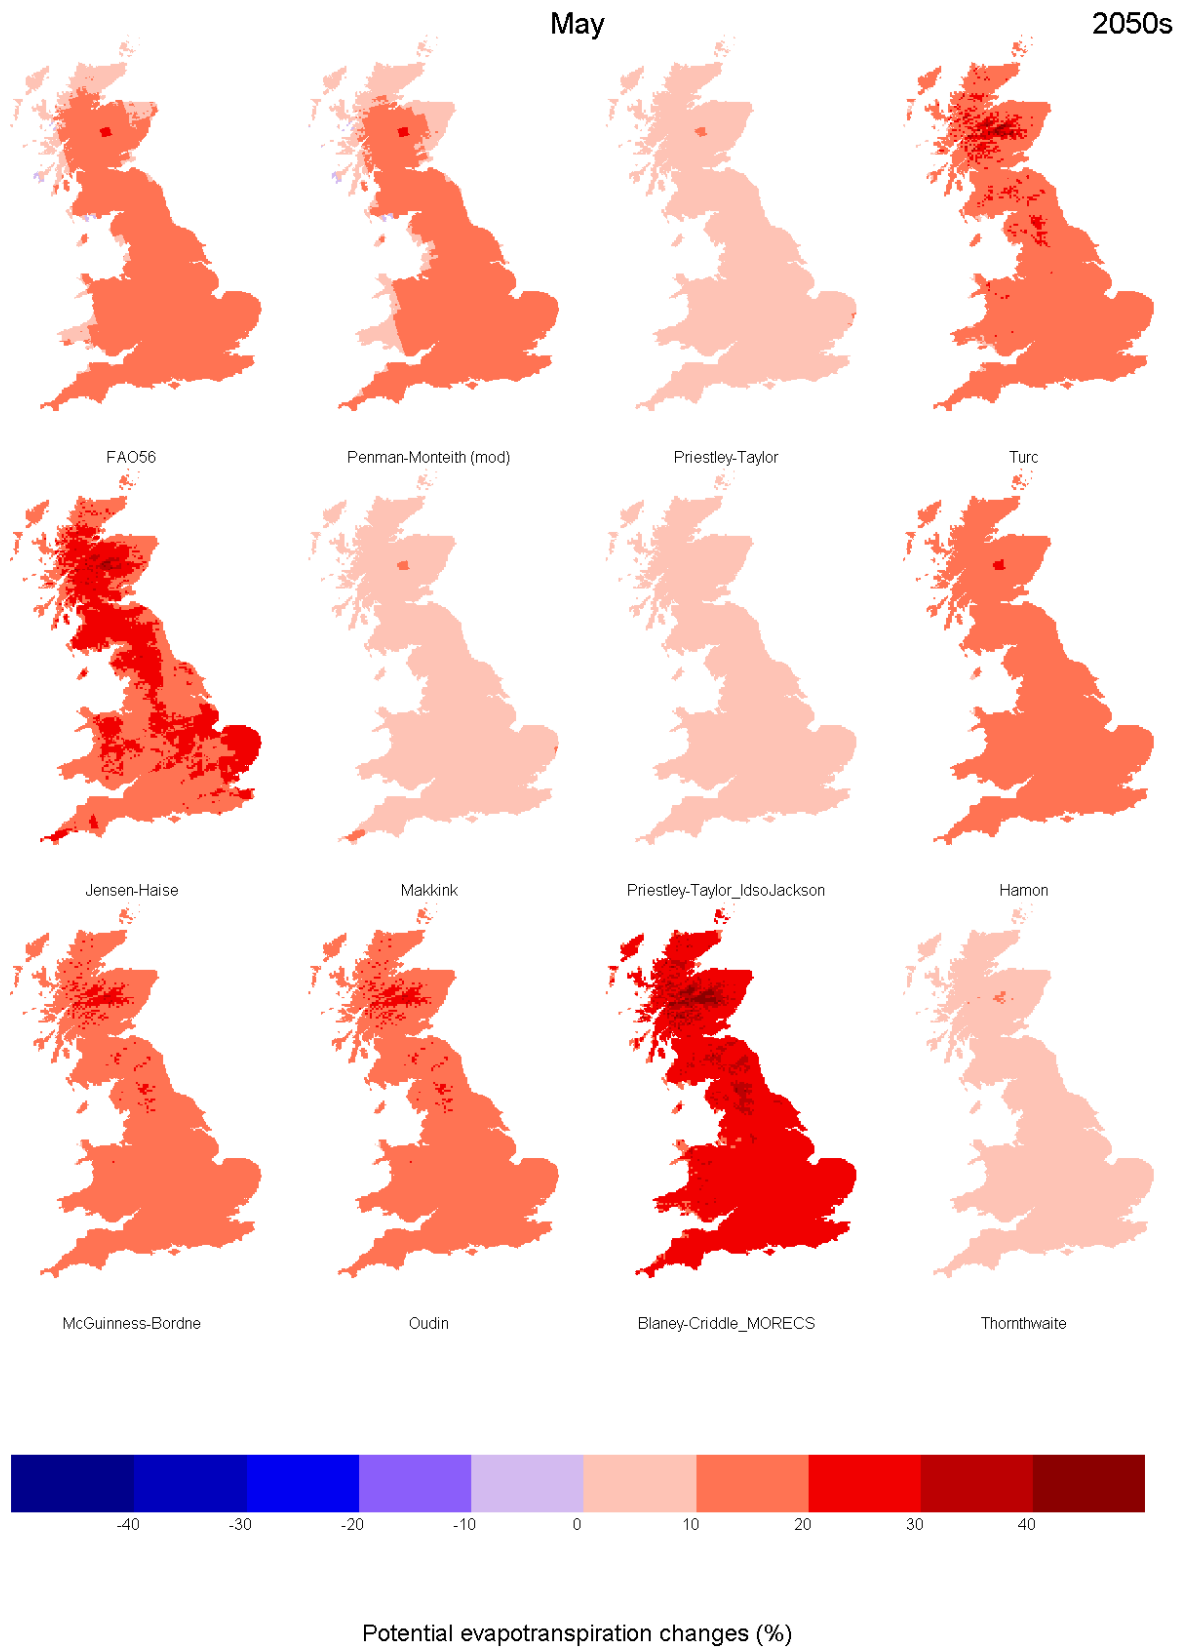

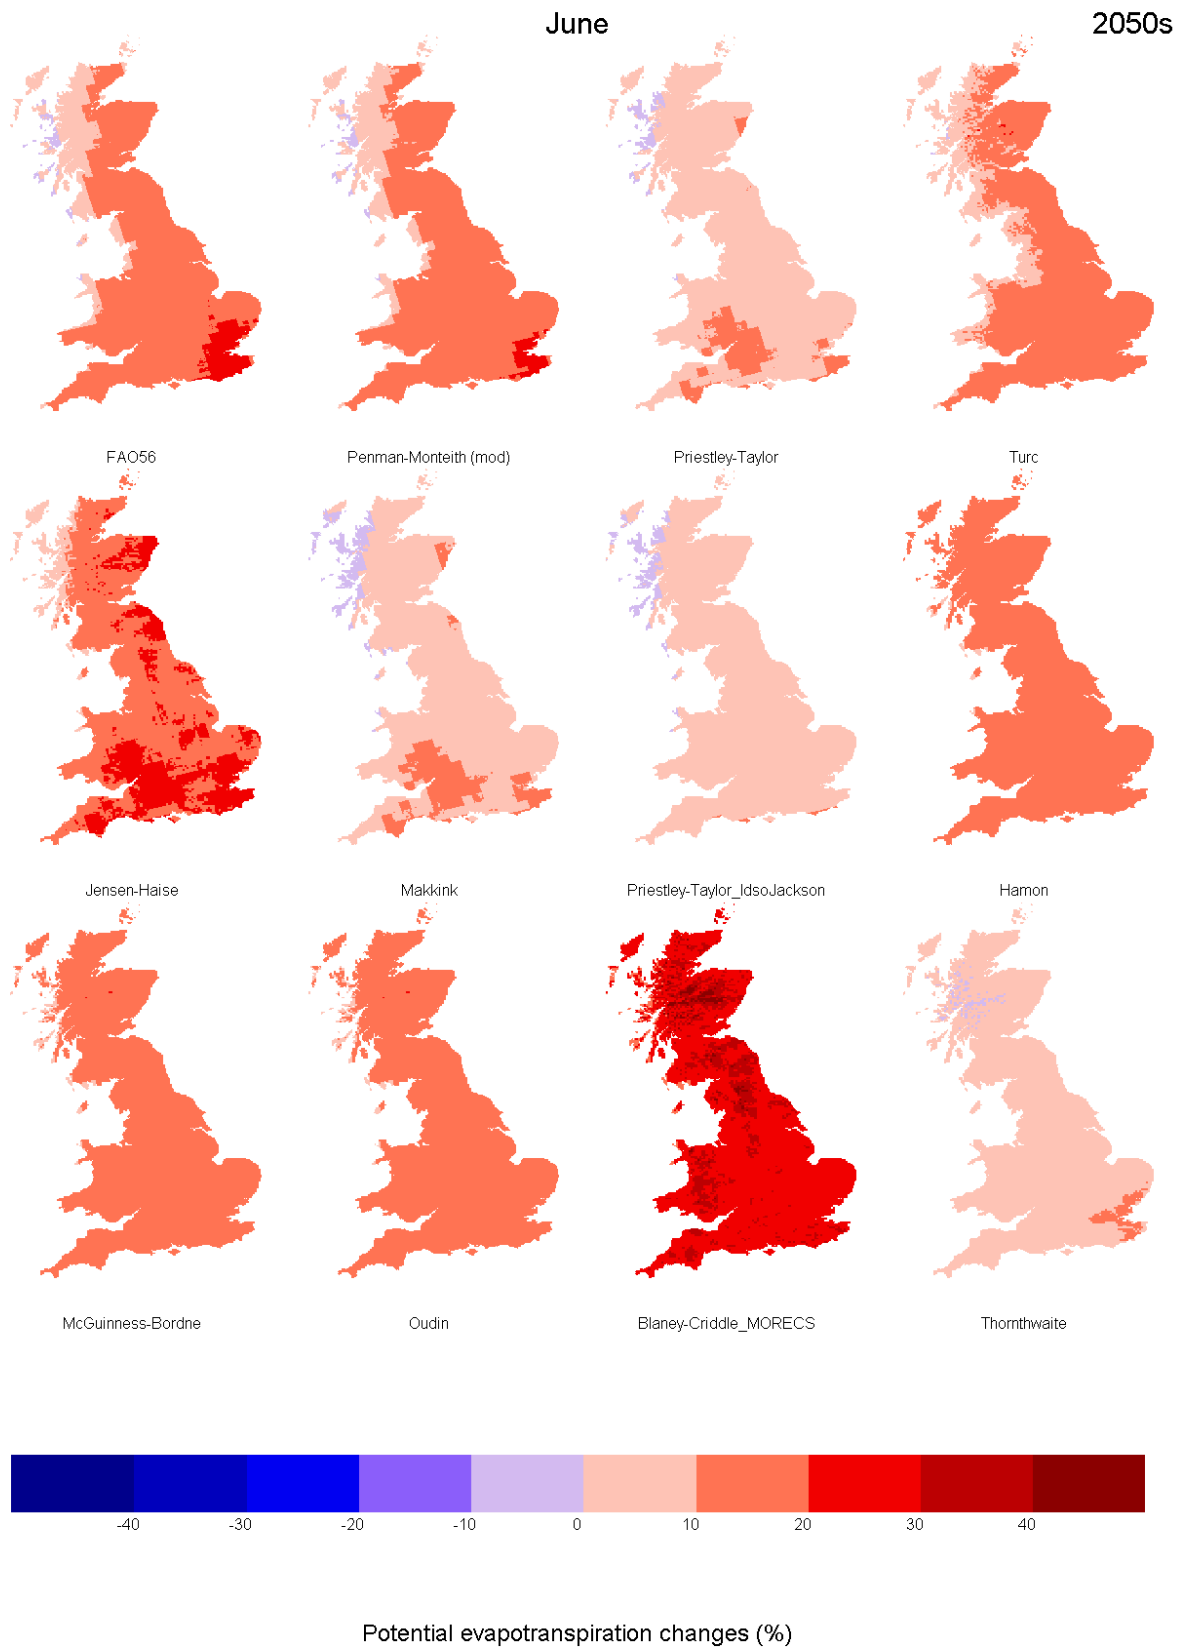



July

2050s

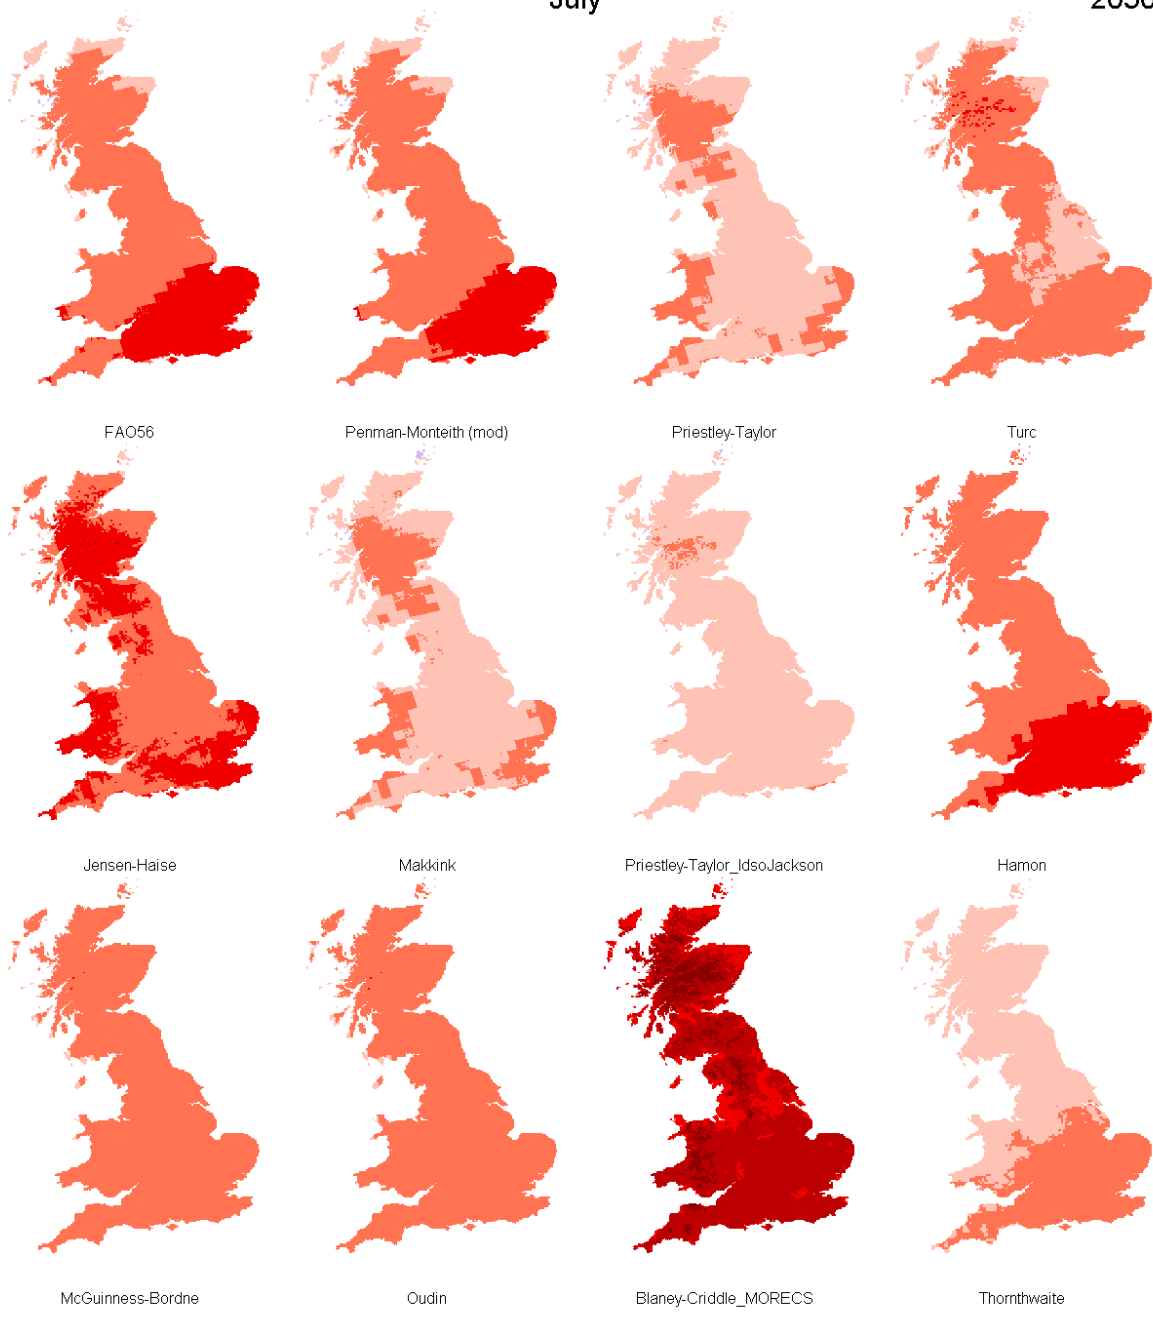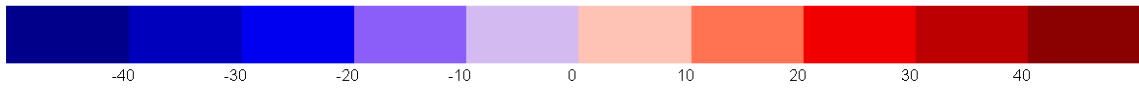

Potential evapotranspiration changes (%)

August

2050s

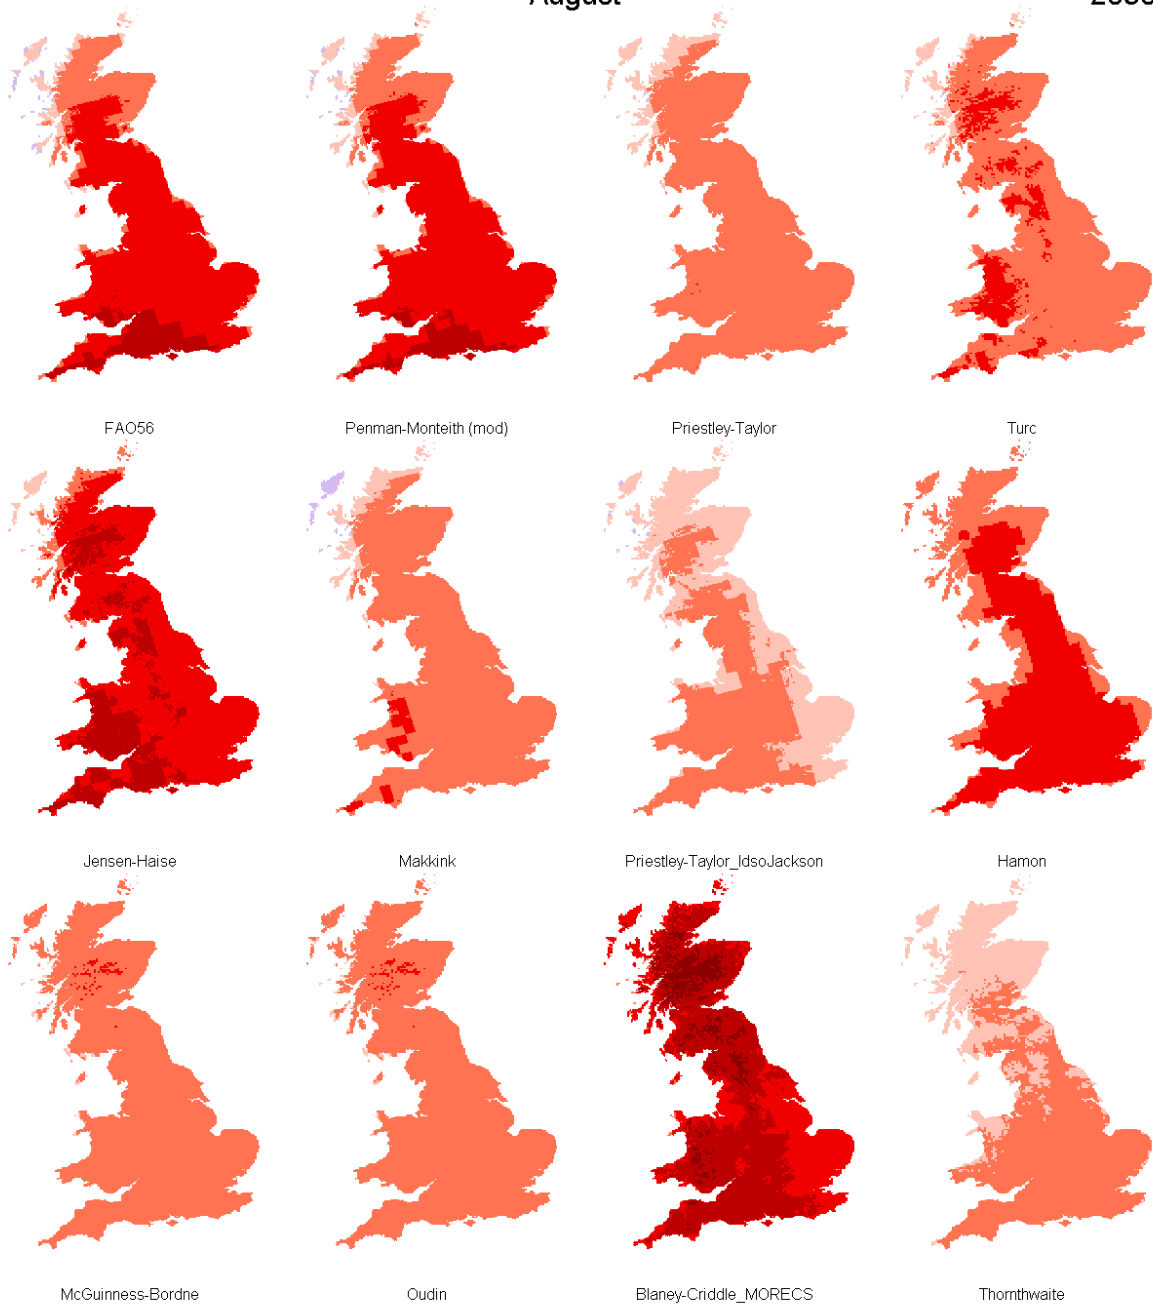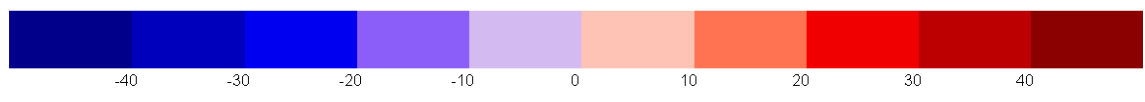

Potential evapotranspiration changes (%)

September

2050s

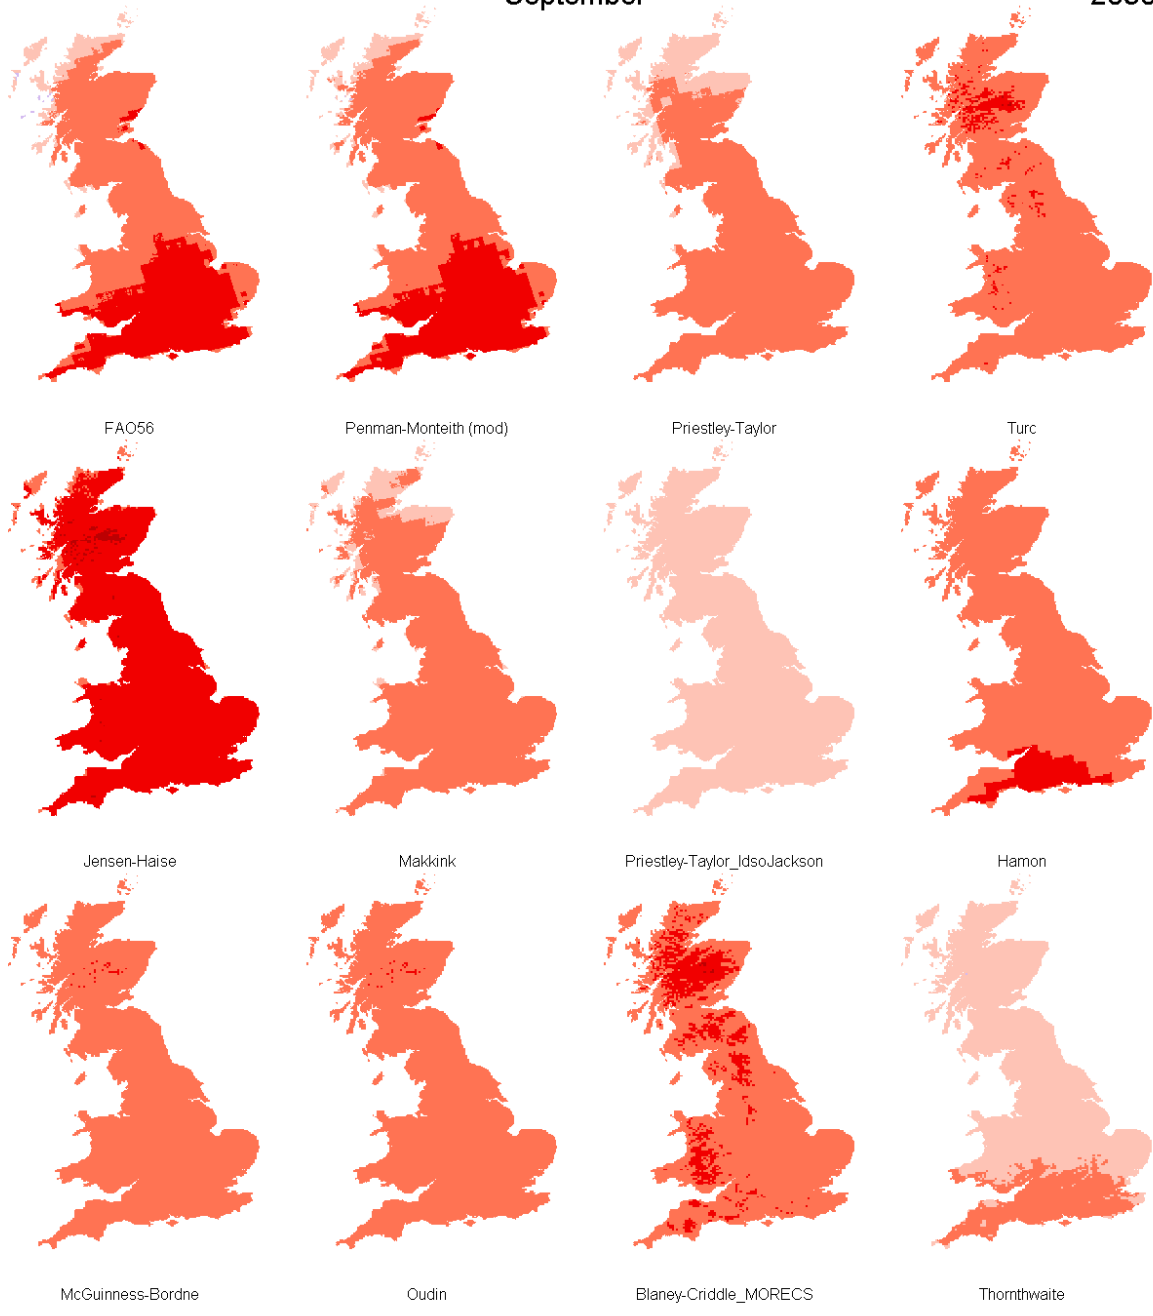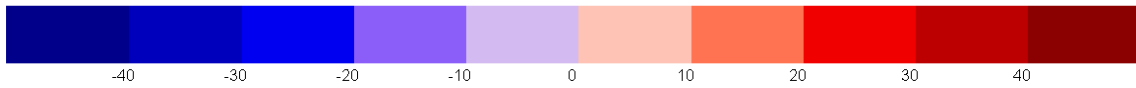

Potential evapotranspiration changes (%)

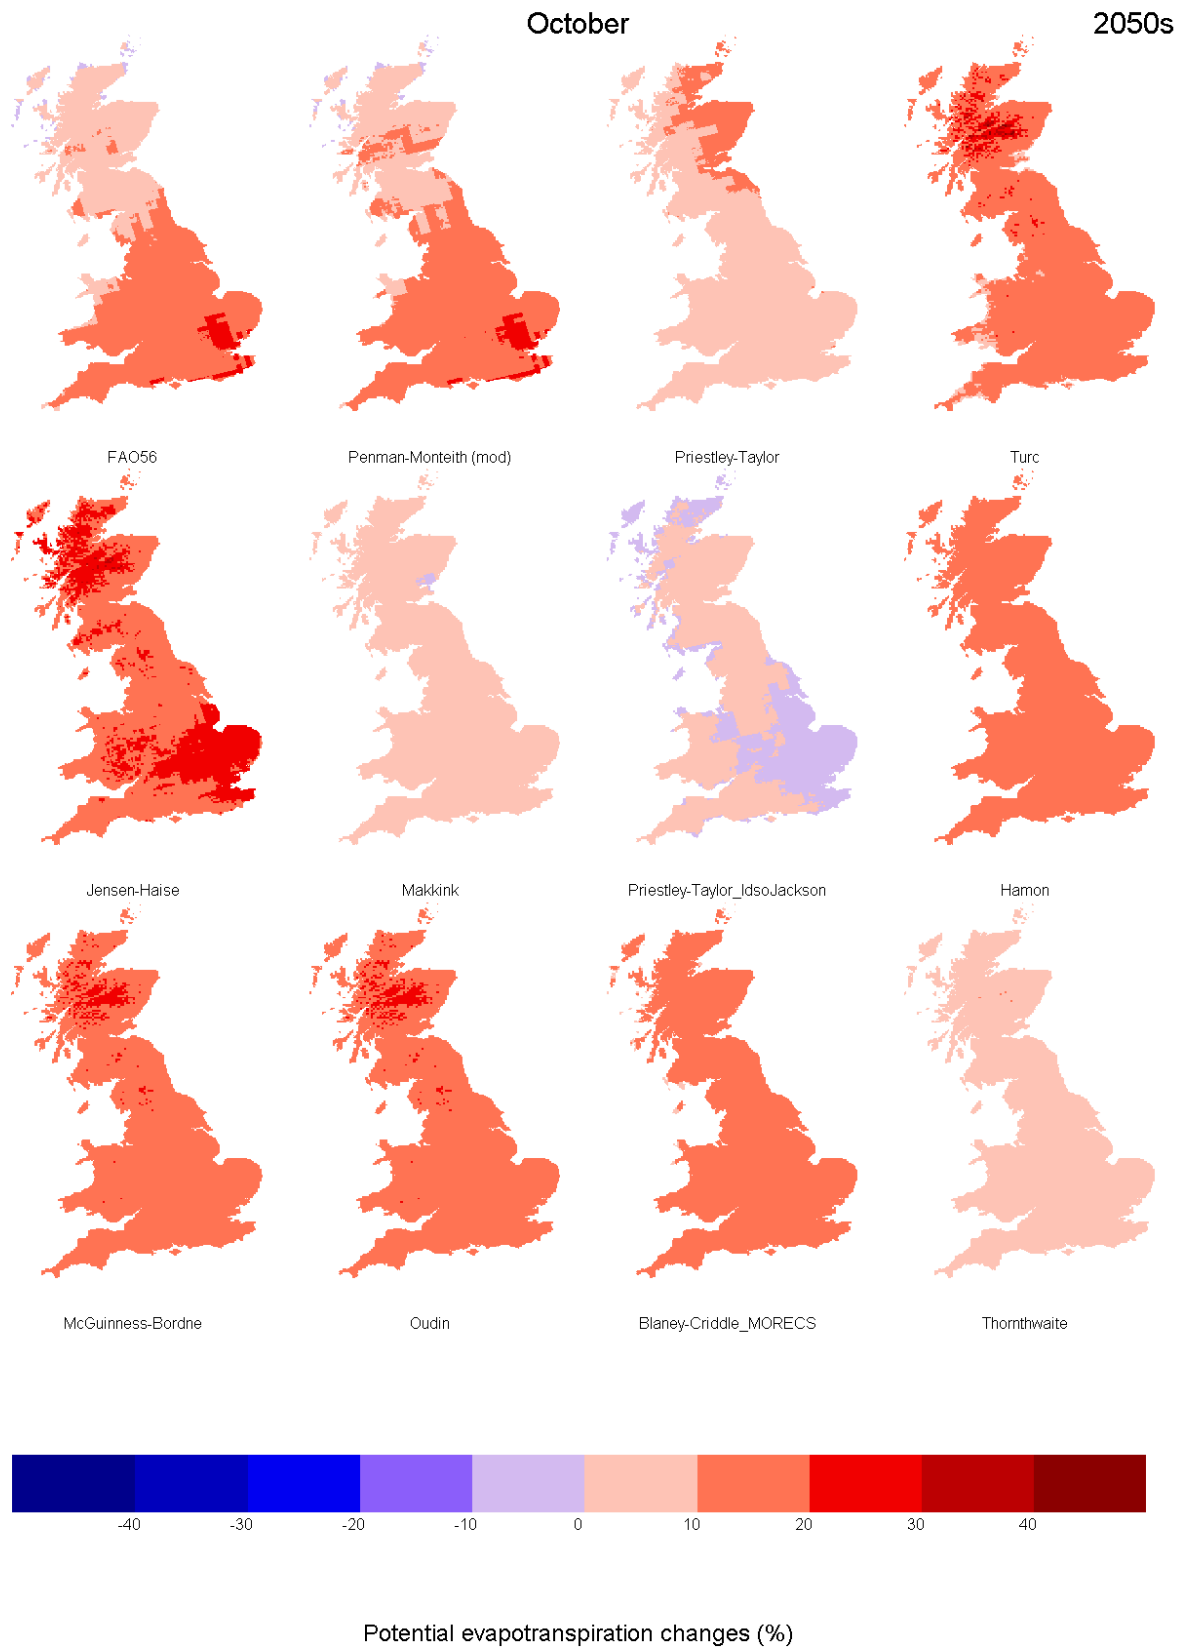

November

2050s

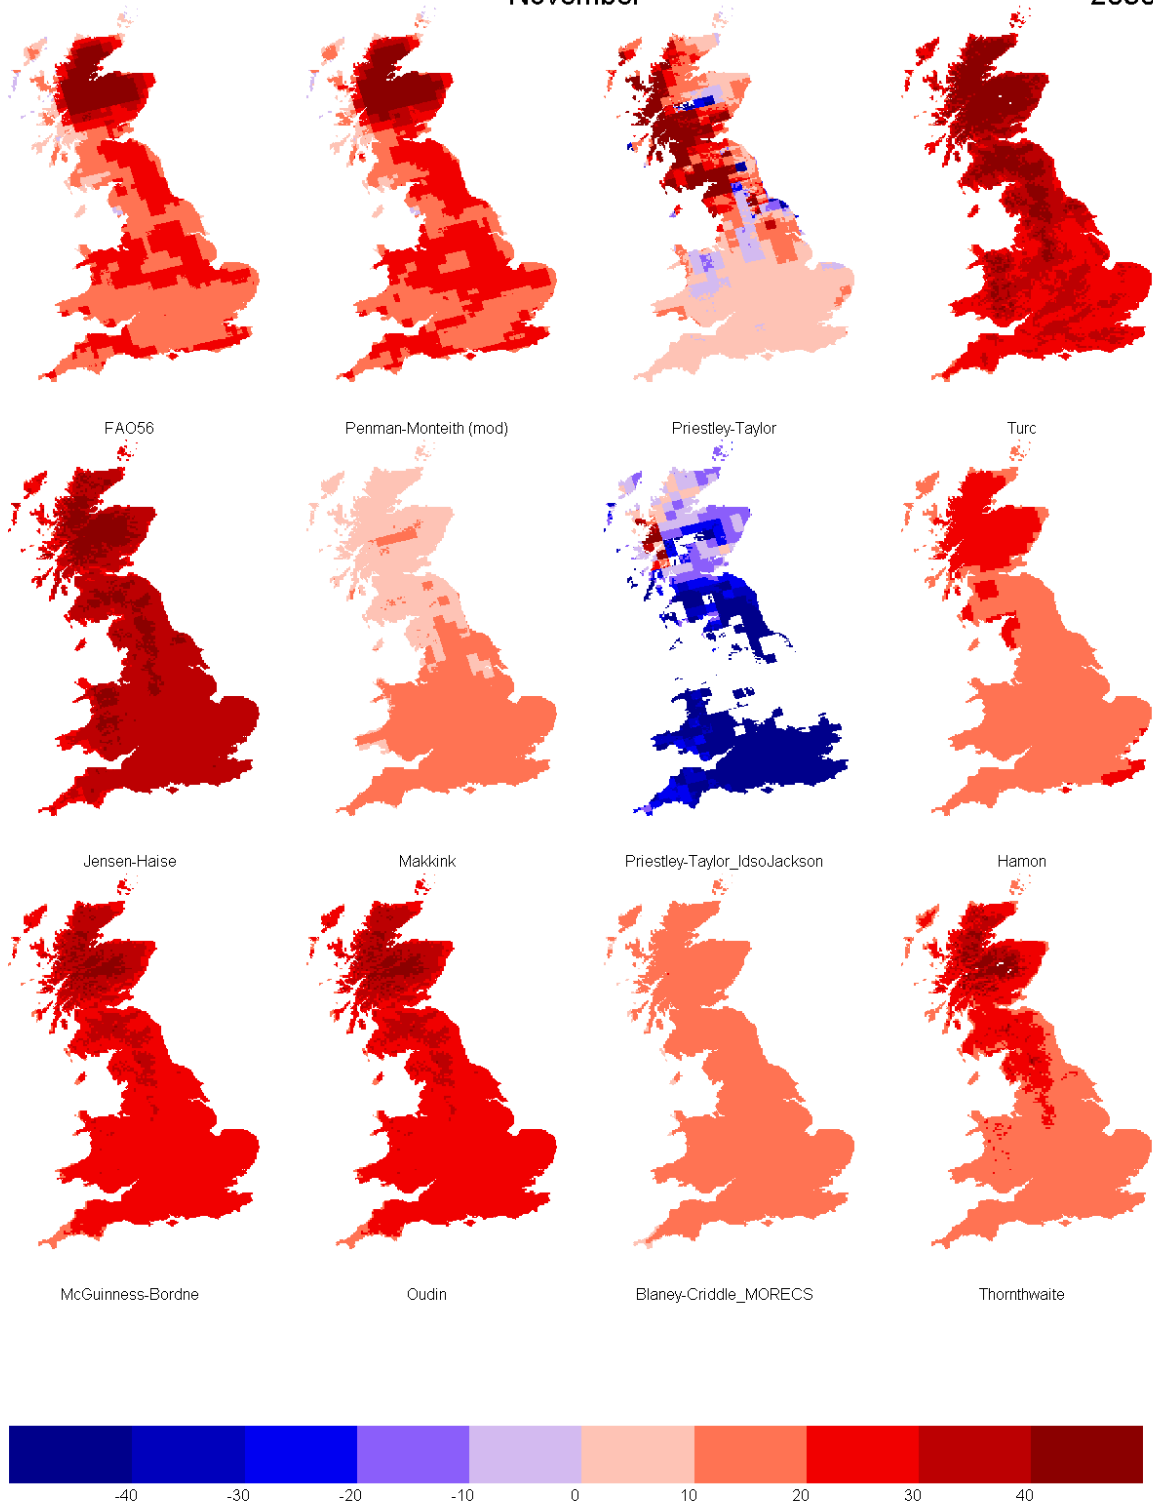

Potential evapotranspiration changes (%)

December

2050s

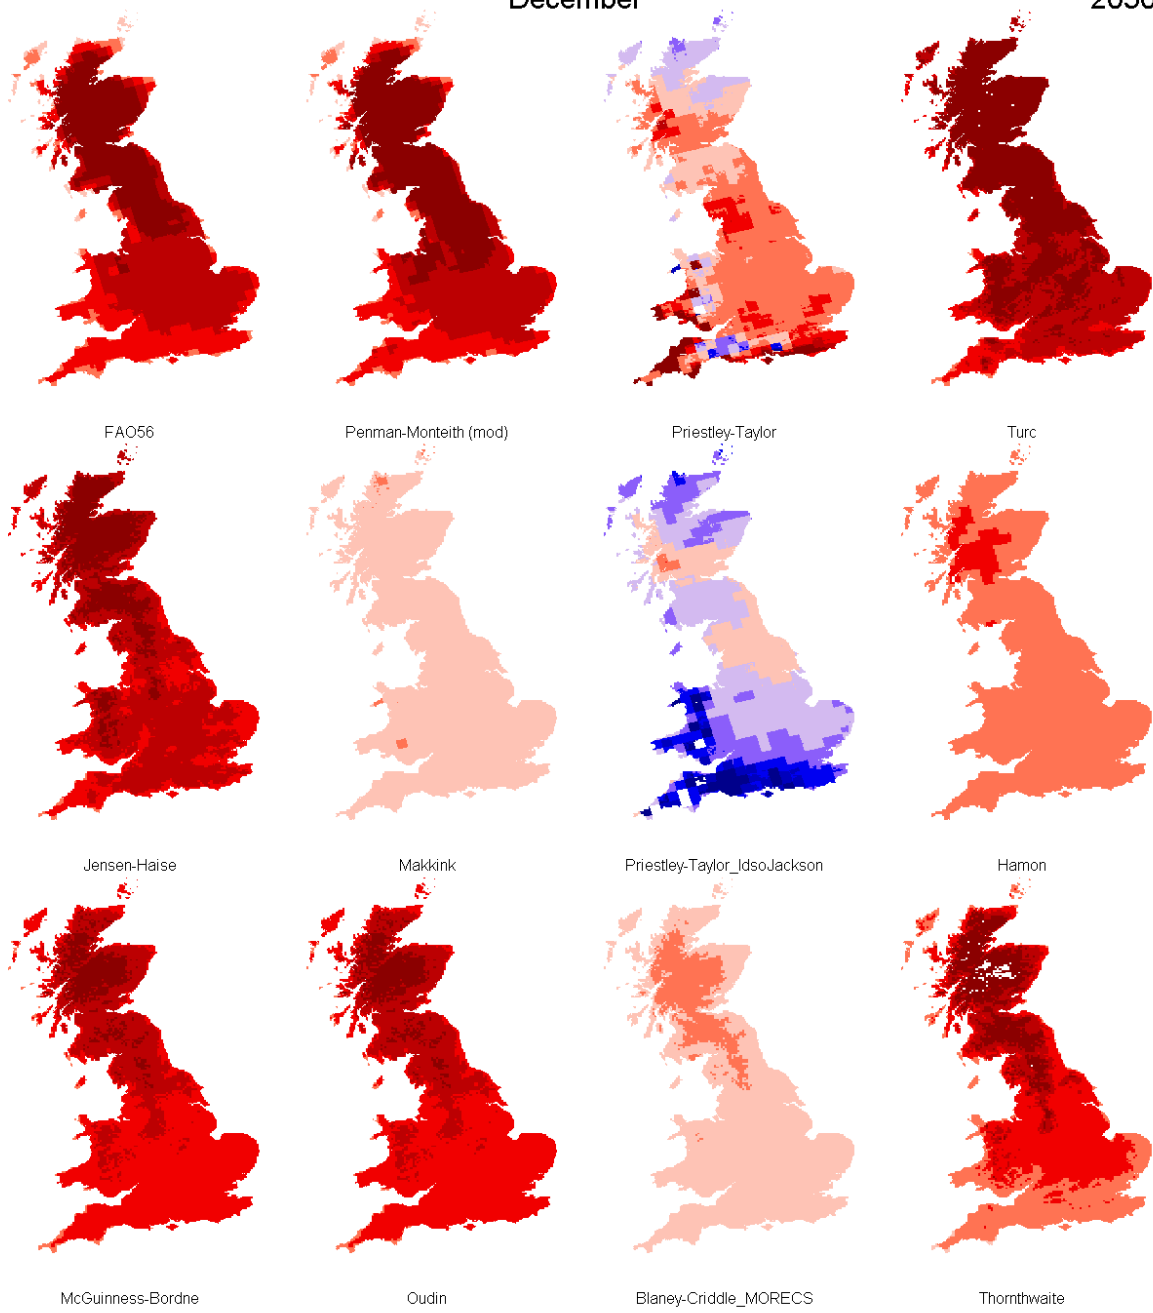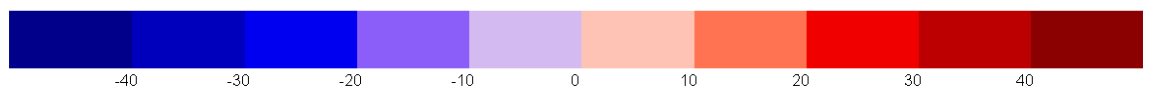

Potential evapotranspiration changes (%)

1

2
